# 1 The genotype-phenotype landscape of an 2 allosteric protein

3 Authors: Drew S. Tack<sup>1</sup>, Peter D. Tonner<sup>1</sup>, Abe Pressman<sup>1</sup>, Nathanael D. Olson<sup>1</sup>, Sasha F. Levy<sup>2,3</sup>, Eugenia  
4 F. Romantseva<sup>1</sup>, Nina Alperovich<sup>1</sup>, Olga Vasilyeva<sup>1</sup>, David Ross<sup>1</sup>

## 5 Affiliations

- 6 1. National Institute of Standards and Technology, Gaithersburg, MD, 20899, USA
- 7 2. SLAC National Accelerator Laboratory, Menlo Park, CA, 94025, USA
- 8 3. Joint Initiative for Metrology in Biology, Stanford, CA, 94305, USA

9

## 10 Abstract

11 Allostery is a fundamental biophysical mechanism that underlies cellular sensing, signaling, and  
12 metabolism. Quantitative methods to characterize the genotype-phenotype relationships for allosteric  
13 proteins would provide data needed to improve engineering of biological systems, to uncover the role of  
14 allosteric mis-regulation in disease, and to develop allosterically targeted drugs<sup>1</sup>. Here we report the  
15 large-scale measurement of the genotype-phenotype landscape for an allosteric protein: the *lac*  
16 repressor from *Escherichia coli*, LacI. Using a method that combines long-read and short-read DNA  
17 sequencing, we quantitatively determine the dose-response curves for nearly 10<sup>5</sup> variants of the LacI  
18 sensor. With the resulting data, we train a deep neural network (DNN) capable of predicting the dose-  
19 response curves for additional LacI genotypes *in silico*. We then map the impact of amino acid  
20 substitutions on the allosteric function of LacI. Additionally, we demonstrate engineering of allosteric  
21 function with unprecedented accuracy by identifying LacI variants from the measured landscape with  
22 quantitatively specified dose-response curves. Finally, we discover sensors with previously unreported  
23 band-stop dose-response curves. Overall, our results provide the first high-coverage, quantitative view  
24 of genotype-phenotype relationships for an allosteric protein, revealing a surprising diversity of  
25 phenotypes and showing that each phenotype is accessible via multiple distinct genotypes.

## 26 Main

27 Genetic sensors are allosteric proteins that regulate gene expression in response to stimuli, giving cells  
28 the ability to regulate their metabolism and respond to environmental changes. Genetic sensors are also  
29 central to engineering biology, with applications in programming logic<sup>2</sup>, optimizing biosynthetic  
30 pathways<sup>3,4</sup>, and controlling cellular differentiation<sup>5</sup>. Like many allosteric genetic sensors, LacI binds to  
31 DNA upstream of regulated genes, preventing transcription. LacI regulates gene expression by switching

1 between DNA-binding and non-binding conformations upon ligand binding at an allosteric site. This  
2 allosteric switching is determined by several biophysical constants, including ligand-binding affinity,  
3 DNA-binding affinity, and the allosteric constant (the thermodynamic equilibrium between the two  
4 conformations)<sup>6-8</sup>. These constants depend on amino acid residues and interactions spread widely  
5 across the protein, making it difficult to predict the effects of changes to the protein sequence.

6 Advances in DNA sequencing have enabled the phenotypic characterization of  $10^4$  to  $10^5$  genotypes in a  
7 single measurement<sup>9-14</sup>. The resulting large-scale genotype-phenotype landscapes have increased our  
8 understanding of biological function and evolutionary dynamics and improved our ability to engineer  
9 biology. Notably, measurements at this scale facilitate the exploration of genotypes with mutations  
10 widely spread throughout a nucleotide or amino acid sequence. So, genotype-phenotype landscape  
11 measurements are ideal for probing complex biological mechanisms, like allostery, that emerge from  
12 broadly distributed intramolecular interactions.

### 13 Mapping the genotype-phenotype landscape

14 Dose-response curves describe the phenotype of a genetic sensor by relating the concentration of an  
15 input ligand ( $L$ ) to an output response (gene expression,  $G$ ). Genetic sensors typically have sigmoidal  
16 dose-response curves that can be represented with the Hill equation:

$$G(L) = G_0 + \frac{G_\infty - G_0}{1 + \left(\frac{EC_{50}}{L}\right)^n} \quad (1)$$

17

18 where  $G_0$  is gene expression in the absence of ligand,  $G_\infty$  is gene expression at saturating ligand  
19 concentrations,  $EC_{50}$  is the ligand concentration that gives half-maximal response, and  $n$  quantifies the  
20 steepness of the dose-response curve (Fig. 1).

21 To map the genotype-phenotype landscape for the allosteric LacI sensor, we engineered a genetic  
22 construct in which LacI modulates cellular fitness by regulating the expression of a tetracycline  
23 resistance gene in response to the concentration of a ligand (isopropyl- $\beta$ -D-thiogalactopyranoside,  
24 IPTG). We then created a library of sensors through mutagenic PCR of *lacI*. To ensure that most sensors  
25 in the library could regulate gene expression, we used fluorescence-activated cell sorting (FACS) to  
26 enrich the library for sensors with low  $G_0$ . Then, using high-accuracy long-read sequencing<sup>15</sup>, we  
27 determined the coding DNA sequence (CDS) of every sensor in the library and indexed each CDS to an  
28 attached DNA barcode (Fig. 1a).

1 To characterize the dose-response curve of each sensor in the library, we grew *E. coli* containing the  
2 library in 24 chemical environments (12 ligand concentrations, each with and without tetracycline,  
3 Fig. 1b-c). We used short-read sequencing of the DNA barcodes to measure the relative abundance of  
4 each sensor at four timepoints during growth. We then used the changes in relative abundance to  
5 determine the fitness associated with each sensor in each environment. For each sensor in the library,  
6 we used the fitness difference (with vs. without tetracycline) from all 12 ligand concentrations to  
7 quantitatively determine the dose-response curve using Bayesian inference (Fig. 1d-e, Fig. 2c-f). Most  
8 sensors had sigmoidal dose-response curves (e.g. Fig. 2g), which we quantitatively characterized by fitting  
9 with the Hill equation.

10 The sensor library contains 62 472 different CDSs, with an average of 7.0 single nucleotide  
11 polymorphisms (SNPs) per CDS. Many SNPs are synonymous, so the library encodes 60 398 different  
12 amino acid sequences with an average of 4.4 amino acid substitutions per sensor (Fig. 2b). Synonymous  
13 SNPs do not measurably impact the sensor phenotype. So, for subsequent analysis, we considered only  
14 amino acid substitutions.

### 15 [DNN predicts allosteric dose-response](#)

16 Our landscape provides the first quantitative dataset of sufficient size to train a DNN capable of  
17 predicting dose-response curves for an allosteric genetic sensor. To build the DNN, we adapted a  
18 recurrent architecture that captures the context-dependent nature of substitutions on protein function.  
19 This architecture predicts Hill equation parameters more accurately than other architectures previously  
20 used to predict protein function<sup>9</sup> (Extended Data Fig. 1). The DNN accurately predicts  $EC_{50}$  and  $G_{\infty}$   
21 (Fig. 3), Hill equation parameters with low measurement uncertainty, but predicts  $G_0$  less accurately, due  
22 to larger proportional measurement uncertainty and the small number of measured sensors with  
23 substantial changes to  $G_0$  (Fig. 4). For most sensors, the parameter  $n$  does not vary beyond the  
24 measurement uncertainty, so it is not included in the model predictions (Extended Data Fig. 2).

25 Uncertainty quantification is crucial for assessing the confidence of model predictions<sup>16</sup>. Previous  
26 examples of DNNs for genotype to phenotype prediction relied on point estimates alone. Here, we  
27 quantified uncertainties for model predictions by performing approximate Bayesian inference of the  
28 model parameters using a variational method<sup>17</sup> (Extended Data Fig. 1). The resulting uncertainties  
29 allowed us to confidently integrate the experimental and DNN results, and thereby explore a larger  
30 landscape than was measured with the experimental data alone.

1 Specifically, by integrating information about the causal substitutions from multiple genetic  
2 backgrounds, the model provides improved estimates of  $EC_{50}$  and  $G_{\infty}$  for sensors with  $EC_{50}$  near or above  
3 the maximum ligand concentration measured (Fig. 3). In addition, the model confidently predicts  $EC_{50}$   
4 and  $G_{\infty}$  for single substitutions that are present within the library only in combination with other  
5 substitutions (Extended Data Fig. 1). Thereby, we were able to use a sufficiently high mutation rate to  
6 explore a broad genotype-phenotype space, while still acquiring the single-substitution information  
7 most useful for building quantitative biophysical models of protein function<sup>6-8</sup>.

## 8 Impact of substitutions on allostery

9 To map the broadly distributed intramolecular interactions that determine the allosteric behavior of  
10 LacI, we examined the dose-response curves of sensors with single substitutions. We used experimental  
11 data and DNN predictions to determine the dose-response curves for 94 % of the SNP-accessible  
12 substitutions (1991 of 2110; 964 directly from measured data, and 1027 from DNN predictions). Most of  
13 the 119 substitutions missing from our dataset were probably excluded by FACS during library  
14 preparation because they caused a substantial increase in  $G_0$ . These include 83 substitutions, located  
15 primarily in the DNA-binding domain or at buried residues in the C-terminal core domain, that have  
16 been shown to result in constitutively high  $G(L)$ <sup>18,19</sup>. Of the 1991 substitutions included in our dataset,  
17 38 % measurably affect the dose-response curve (beyond a 95 % confidence bound), and the impact of  
18 each substitution depends strongly on its location within the protein structure (Fig. 4).

19 Substitutions that increase  $G_0$  by more than 5-fold but were not excluded by FACS are located either in  
20 helix 4 of the DNA-binding domain, along the dimer interface, in the tetramerization helix, or at the  
21 protein start codon (Fig. 4a,d).  $G_0$  quantifies the sensor state in the absence of ligand. So, apart from  
22 substitutions at the start codon that reduce the number of LacI proteins per cell<sup>20</sup>, these substitutions  
23 probably affect either the DNA binding affinity, the allosteric constant of the sensor, or both<sup>8</sup>.

24 Interestingly, substitutions in helix 4 (R51C, Q54K, and L56M) and near the dimer interface (T68N, L71Q)  
25 that increase  $G_0$  also decrease  $EC_{50}$  approximately 10-fold, consistent with a change in the allosteric  
26 constant<sup>8</sup>.

27 Substitutions that decrease  $G_{\infty}$  by more than 5-fold are all located near the ligand-binding pocket or  
28 along the dimer interface (Fig. 4b,e). Six of these substitutions also increase  $EC_{50}$  more than 5-fold (A75T,  
29 D88N, S193L, Q248R, D275Y, and F293Y). Except for D88N, which is at the dimer interface, these  
30 substitutions are in the ligand-binding pocket. Substitutions near the ligand-binding pocket probably

1 change ligand binding affinity, though previous work has shown that they can also change the allosteric  
2 constant <sup>8</sup>.

3 In addition to specific substitutions that affect both  $G_{\infty}$  and  $EC_{50}$ , we identified nine positions (N125,  
4 P127, D149, V192, A194, A245, N246, T276, Q291), where different substitutions either reduce  $G_{\infty}$  by  
5 more than 5-fold or increase  $EC_{50}$  by more than 5-fold, but not both. All these positions are in the ligand-  
6 binding pocket. We also identified five positions (H74, V80, K84, S97, M98) where different substitutions  
7 reduce either  $G_{\infty}$  or  $EC_{50}$  by more than 5-fold but not both (Extended Data Fig. 3). All of these positions  
8 are located at the dimer interface.

9 Substitutions that affect  $EC_{50}$  are the most numerous and are spread throughout the protein structure,  
10 with approximately 9 % and 27 % of all substitutions causing a greater than 5-fold or 2-fold shift in  $EC_{50}$ ,  
11 respectively (Fig. 4c,f). The strongest effects are from substitutions in the DNA-binding domain, ligand-  
12 binding pocket, core-pivot domain, or dimer interface. Substitutions to the DNA-binding domain or  
13 dimer interface generally decrease  $EC_{50}$ . Substitutions to the ligand-binding pocket or core-pivot domain  
14 generally increase  $EC_{50}$ .

15 Combining multiple substitutions in a single protein almost always has a log-additive effect on  $EC_{50}$ . Only  
16 0.57 % (12 of 2101) of double substitutions have an  $EC_{50}$  that differs from the log-additive effects of the  
17 single substitutions by more than 2.5-fold (Extended Data Fig. 4). This result, combined with the wide  
18 distribution of residues that affect  $EC_{50}$ , suggests that LacI allostery is controlled by a free energy  
19 balance with additive contributions from many residues and interactions<sup>7,8,21,22</sup>.

## 20 Precise engineering of genetic sensors

21 The sensor library contained a wide diversity of sensor function, with  $EC_{50}$  values spanning more than  
22 three orders of magnitude (less than 1  $\mu\text{mol/L}$  to over 1000  $\mu\text{mol/L}$ , Fig. 2c-e) and  $G_0$  and  $G_{\infty}$  values  
23 covering more than a 35-fold range (Fig. 2f). To take advantage of this diversity, we demonstrated a new  
24 approach to engineering biological function by choosing the corresponding CDS for any desired dose-  
25 response curve within the range of the library.

26 For example, we identified sensors with  $EC_{50}$  ranging from 3  $\mu\text{mol/L}$  to over 1000  $\mu\text{mol/L}$  (and  $G_0$ ,  $G_{\infty}$   
27 near the wild-type values). We then verified the dose-response curve of each identified sensor by re-  
28 synthesizing the CDS, integrating it into a different genetic construct where it regulated the expression  
29 of a fluorescent protein, and measuring fluorescence at 12 ligand concentrations using flow cytometry  
30 (Fig. 2g). Comparison between the flow cytometry and the sequencing-based results indicates that we

1 can use this approach to engineer sensors with defined  $EC_{50}$  within 1.25-fold of a targeted value  
2 (Extended Data Fig. 5). In addition, we identified and verified the dose-response curves of sensors with  
3 near-wild-type  $EC_{50}$ , but non-wild-type values for  $G_0$  or  $G_\infty$  (Fig. 2h). Because of the non-linearity of the  
4 fitness impact of tetracycline, the accuracy for engineering sensors with different  $G_0$  and  $G_\infty$  levels  
5 depends on the growth conditions, particularly the tetracycline concentration. Here, the relative  
6 accuracy varied from 1.12-fold near the wild-type  $G_\infty$  level to 4.3-fold near the wild-type  $G_0$  level. To our  
7 knowledge, this is the first demonstration of engineering allosteric function with quantitatively targeted  
8 performance parameters and associated quantification of accuracy.

9 To further illustrate the range of sensor phenotypes that can be engineered with this approach, we  
10 identified and verified the dose-response curves of inverted sensors, i.e. sensors with  $G_0 > G_\infty$ . (Fig. 2i).  
11 Approximately 230 sensors in the library are inverted (0.35 % of the measured library, Fig. 2a), though  
12 less than half have a dynamic range with  $G_0/G_\infty > 2$ . By examining a set of 43 strongly inverted sensors  
13 (with  $G_0/G_\infty > 2$ ,  $G_0 > G_{\infty,wt}/2$ , and  $EC_{50}$  between 3  $\mu\text{mol/L}$  and 1000  $\mu\text{mol/L}$ ), we identified 10  
14 substitutions associated with the inverted phenotype (S70I, K84N, D88Y, V96E, A135T, V192A, G200S,  
15 Q248H, Y273H, A343G). However, none of these substitutions are present in more than 12 % of the  
16 strongly inverted sensors, and 51 % of the strongly inverted sensors have none of these substitutions.  
17 Furthermore, the strongly inverted sensors are more genetically distant from each other than randomly  
18 selected sensors from the library (Extended Data Fig. 6).

19 Inverted sensors can provide specific insight into the allosteric mechanisms of LacI, since they require  
20 inversion of both the allosteric constant<sup>6</sup> and the relative ligand-binding affinity between the two  
21 conformations<sup>7</sup>. Although the set of strongly inverted sensors are genetically diverse, many of them  
22 share common features that may account for these allosteric changes. First, 67 % of the strongly  
23 inverted sensors have substitutions near the ligand-binding pocket (within 7 Å), which likely contribute  
24 to the change in ligand-binding affinity. Surprisingly, 21 % of the strongly inverted sensors have no  
25 substitutions within 10 Å of the binding pocket, so binding affinity must be indirectly affected by distal  
26 substitutions in these sensors. Second, nearly all strongly inverted sensors have substitutions at the  
27 dimer interface (91 %, compared to 54 % for the full library), with most (70 %) having substitutions in  
28 helix 5 (47 %), helix 11 (28 %), or both (5 %, Extended Data Fig. 6). This suggests that residues in those  
29 structural domains play an important role in determining the allosteric constant.

## 1 Novel sensor phenotypes

2 In addition to the normal and inverted phenotypes, we were surprised to find sensors with dose-  
3 response curves that do not match the sigmoidal form of the Hill equation. Specifically, we found  
4 sensors with band-pass or band-stop dose-response curves, i.e. sensors that repress or activate gene  
5 expression only over a narrow range of ligand concentrations. We verified the dose-response curves of  
6 13 band-stop sensors and three band-pass sensors using flow cytometry (Fig. 2j,k). To our knowledge,  
7 this is the first identification of single-protein genetic sensors with band-stop dose-response curves.

8 Phenotypic similarities between the band-stop and inverted sensors (i.e. high  $G_0$  and initially decreasing  
9 gene expression as ligand concentration increases) imply similar biophysical requirements. However, the  
10 two-step switching of band-stop sensors suggests the relevant free energy changes may be more  
11 entropic than structural<sup>23</sup>. Indeed, substitutions associated with band-stop sensors are remarkably  
12 different from those found for the inverted sensors. While inverted sensors often have substitutions  
13 near the ligand-binding pocket and dimer interface, a set of 31 strong band-stop sensors are twice as  
14 likely as the full library to have substitutions in helix 9 (32 % compared to 16 %) and nearly four times as  
15 likely to have substitutions in strand J (13 % compared to 3.4 %). Helix 9 is on the periphery of the  
16 protein, and strand J is in the center of the C-terminal core domain. Furthermore, 100 % of the strong  
17 band-stop sensors had substitutions in the C-terminal core of the protein, compared with 79 % of the  
18 full library (Extended Data Fig. 6).

19 To further investigate the band-stop phenotype, we identified a band-stop sensor from the landscape  
20 measurement with only three substitutions (R195H/G265D/A337D). We synthesized sensors with all  
21 possible combinations of those substitutions and measured their dose-response curves. Although each  
22 single substitution resulted in a sigmoidal dose-response similar to wild-type LacI, the combination of  
23 two substitutions (R195H/G265D) gave rise to the band-stop phenotype (Extended Data Fig. 7). The  
24 existence of a band-stop sensor only two substitutions from the wild-type LacI indicates that novel and  
25 potentially useful phenotypes exist with readily accessible genotypes. This conclusion is further  
26 supported by the relative abundance of band-stop sensors, which comprise nearly 0.2 % of the full  
27 library. For comparison, directed evolution to engineer new phenotypes often involves the creation of  
28 libraries with more than  $10^8$  variants<sup>24</sup>.

## 1 [Discussion](#)

2 Overall, our findings suggest that a surprising diversity of useful and potentially novel allosteric protein  
3 phenotypes exist with genotypes that are discoverable via large-scale landscape measurements. As DNA  
4 sequencing improves, large-scale landscape measurements like this one will become increasingly  
5 accessible and will improve our fundamental understanding of biology while also enabling robust and  
6 scalable engineering of biological function for applications such as living therapeutics<sup>25</sup>, structured  
7 materials fabrication<sup>26</sup>, and engineered morphogenesis<sup>27</sup>.

## 8 [Accession codes](#)

9 Primary accession codes

10 *Bioproject*

11 [Long-Read and Barcode Sequencing](#)

12 **PRJNA643436**

13 *Genbank*

14 [Library Plasmid](#)

15 **MT702633**

16 [Verification Plasmid](#)

17 **MT702634**

18 Referenced accession codes

19 *Protein Data Bank*

20 [DNA-binding conformation of LacI](#)

21 **1LBG**

22 [Ligand-binding conformation of LacI](#)

23 **1LBH**



## 1   References

- 2   1. Nussinov, R. & Tsai, C.-J. Allostery in Disease and in Drug Discovery. *Cell* **153**, 293–305 (2013).
- 3   2. Nielsen, A. A. K. *et al.* Genetic circuit design automation. *Science* **352**, aac7341 (2016).
- 4   3. Dietrich, J. A., Shis, D. L., Alikhani, A. & Keasling, J. D. Transcription Factor-Based Screens and  
5       Synthetic Selections for Microbial Small-Molecule Biosynthesis. *ACS Synth. Biol.* **2**, 47–58 (2013).
- 6   4. Li, J.-W., Zhang, X.-Y., Wu, H. & Bai, Y.-P. Transcription Factor Engineering for High-Throughput Strain  
7       Evolution and Organic Acid Bioproduction: A Review. *Front Bioeng Biotechnol* **8**, 98 (2020).
- 8   5. Healy, C. P. & Deans, T. L. Genetic circuits to engineer tissues with alternative functions. *J Biol Eng* **13**,  
9       (2019).
- 10   6. Monod, J., Wyman, J. & Changeux, J. P. ON THE NATURE OF ALLOSTERIC TRANSITIONS: A PLAUSIBLE  
11       MODEL. *J. Mol. Biol.* **12**, 88–118 (1965).
- 12   7. Razo-Mejia, M. *et al.* Tuning Transcriptional Regulation through Signaling: A Predictive Theory of  
13       Allosteric Induction. *Cell Systems* **6**, 456-469.e10 (2018).
- 14   8. Chure, G. *et al.* Predictive shifts in free energy couple mutations to their phenotypic consequences.  
15       *PNAS* **116**, 18275–18284 (2019).
- 16   9. Sarkisyan, K. S. *et al.* Local fitness landscape of the green fluorescent protein. *Nature* **533**, 397–401  
17       (2016).
- 18   10.    Li, C., Qian, W., Maclean, C. J. & Zhang, J. The fitness landscape of a tRNA gene. *Science* **352**,  
19       837–840 (2016).
- 20   11.    Pressman, A. D. *et al.* Mapping a Systematic Ribozyme Fitness Landscape Reveals a Frustrated  
21       Evolutionary Network for Self-Aminoacylating RNA. *J. Am. Chem. Soc.* **141**, 6213–6223 (2019).
- 22   12.    Domingo, J., Diss, G. & Lehner, B. Pairwise and higher-order genetic interactions during the  
23       evolution of a tRNA. *Nature* **558**, 117–121 (2018).

- 1 13. Puchta, O. *et al.* Network of epistatic interactions within a yeast snoRNA. *Science* **352**, 840–844  
2 (2016).
- 3 14. Li, C. & Zhang, J. Multi-environment fitness landscapes of a tRNA gene. *Nat Ecol Evol* **2**, 1025–  
4 1032 (2018).
- 5 15. Wenger, A. M. *et al.* Accurate circular consensus long-read sequencing improves variant  
6 detection and assembly of a human genome. *Nature Biotechnology* **37**, 1155–1162 (2019).
- 7 16. Ovadia, Y. *et al.* Can You Trust Your Model’s Uncertainty? Evaluating Predictive Uncertainty  
8 Under Dataset Shift. *arXiv:1906.02530 [cs, stat]* (2019).
- 9 17. Blundell, C., Cornebise, J., Kavukcuoglu, K. & Wierstra, D. Weight Uncertainty in Neural  
10 Networks. *arXiv:1505.05424 [cs, stat]* (2015).
- 11 18. Markiewicz, P., Kleina, L. G., Cruz, C., Ehret, S. & Miller, J. H. Genetic Studies of the lac Repressor.  
12 XIV. Analysis of 4000 Altered Escherichia coli lac Repressors Reveals Essential and Non-essential  
13 Residues, as well as ‘Spacers’ which do not Require a Specific Sequence. *Journal of Molecular Biology*  
14 **240**, 421–433 (1994).
- 15 19. Pace, H. C. *et al.* Lac repressor genetic map in real space. *Trends in Biochemical Sciences* **22**,  
16 334–339 (1997).
- 17 20. Hecht, A. *et al.* Measurements of translation initiation from all 64 codons in E. coli. *Nucleic Acids*  
18 *Res* **45**, 3615–3626 (2017).
- 19 21. Functional Plasticity and Evolutionary Adaptation of Allosteric Regulation | bioRxiv.  
20 <https://www.biorxiv.org/content/10.1101/2020.02.10.942417v1>.
- 21 22. Daber, R., Sochor, M. A. & Lewis, M. Thermodynamic analysis of mutant lac repressors. *J. Mol.*  
22 *Biol.* **409**, 76–87 (2011).
- 23 23. Motlagh, H. N., Wrabl, J. O., Li, J. & Hilser, V. J. The ensemble nature of allostery. *Nature* **508**,  
24 331–339 (2014).

- 1 24. Nannemann, D. P., Birmingham, W. R., Scism, R. A. & Bachmann, B. O. Assessing directed  
2 evolution methods for the generation of biosynthetic enzymes with potential in drug biosynthesis.  
3 *Future Med Chem* **3**, 809–819 (2011).
- 4 25. Landry, B. P. & Tabor, J. J. Engineering Diagnostic and Therapeutic Gut Bacteria. *Microbiol Spectr*  
5 **5**, (2017).
- 6 26. Gilbert, C. & Ellis, T. Biological Engineered Living Materials: Growing Functional Materials with  
7 Genetically Programmable Properties. *ACS Synth. Biol.* **8**, 1–15 (2019).
- 8 27. Teague, B. P., Guye, P. & Weiss, R. Synthetic Morphogenesis. *Cold Spring Harb Perspect Biol* **8**,  
9 (2016).
- 10 28. Sarkar, S., Tack, D. & Ross, D. Sparse estimation of mutual information landscapes quantifies  
11 information transmission through cellular biochemical reaction networks. *Communications Biology* **3**,  
12 1–8 (2020).
- 13 29. Zhao, L., Liu, Z., Levy, S. F. & Wu, S. Bartender: a fast and accurate clustering algorithm to count  
14 barcode reads. *Bioinformatics* **34**, 739–747 (2018).
- 15 30. Kivioja, T. *et al.* Counting absolute numbers of molecules using unique molecular identifiers.  
16 *Nature Methods* **9**, 72–74 (2012).
- 17 31. Wu, B., Gokhale, C. S., van Veelen, M., Wang, L. & Traulsen, A. Interpretations arising from  
18 Wrightian and Malthusian fitness under strong frequency dependent selection. *Ecol Evol* **3**, 1276–  
19 1280 (2013).
- 20 32. Carpenter, B. *et al.* Stan: A Probabilistic Programming Language. *Journal of Statistical Software*  
21 **76**, 1–32 (2017).
- 22 33. Gaussian Processes for Machine Learning (Adaptive Computation and Machine Learning) |  
23 Guide books. <https://dl.acm.org/doi/book/10.5555/1162254>.

- 1 34. Rubin, D. B. Estimation in Parallel Randomized Experiments. *Journal of Educational Statistics* **6**,
- 2 377–401 (1981).
- 3 35. Diagnosing Biased Inference with Divergences. [https://mc-stan.org/users/documentation/case-](https://mc-stan.org/users/documentation/case-studies/divergences_and_bias.html)
- 4 [studies/divergences\\_and\\_bias.html](https://mc-stan.org/users/documentation/case-studies/divergences_and_bias.html).
- 5 36. Lewis, M. *et al.* Crystal structure of the lactose operon repressor and its complexes with DNA
- 6 and inducer. *Science* **271**, 1247–1254 (1996).
- 7 37. Hochreiter, S. & Schmidhuber, J. Long Short-Term Memory. *Neural Comput.* **9**, 1735–1780
- 8 (1997).
- 9 38. Paszke, A. *et al.* PyTorch: An Imperative Style, High-Performance Deep Learning Library.
- 10 *arXiv:1912.01703 [cs, stat]* (2019).
- 11 39. Kingma, D. P. & Ba, J. Adam: A Method for Stochastic Optimization. *arXiv:1412.6980 [cs]* (2017).

1 Figures

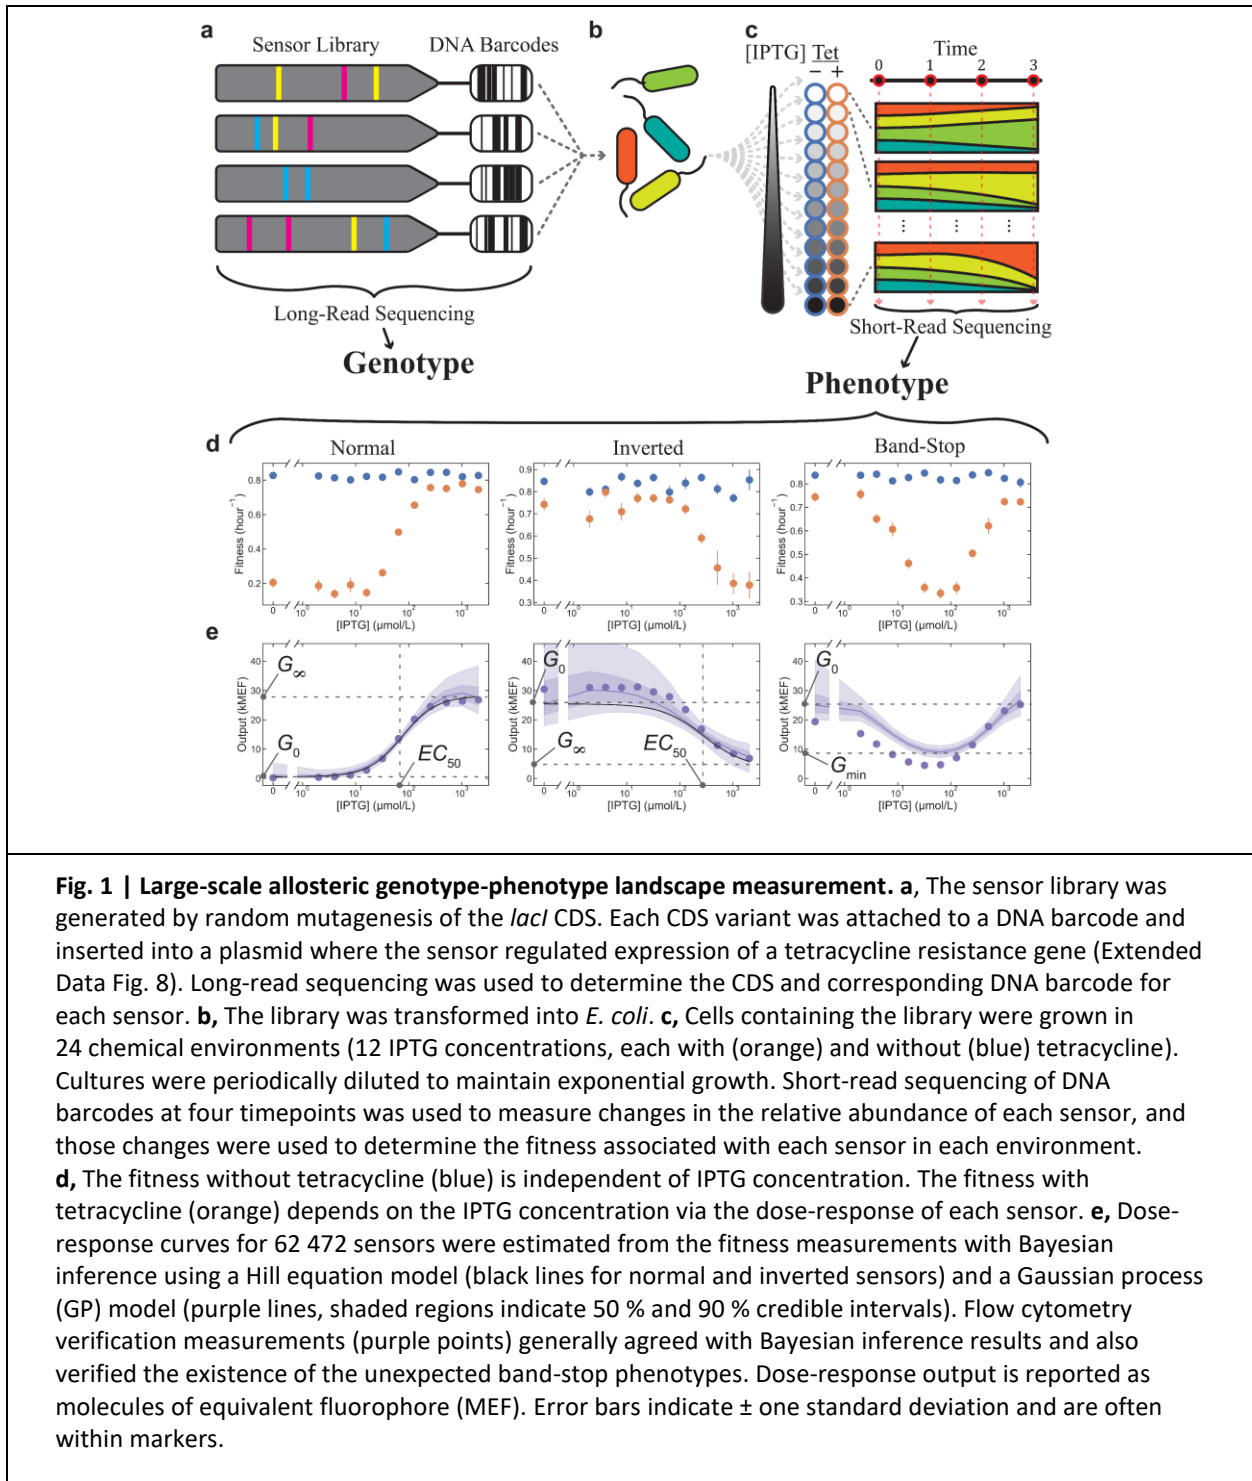

2

3

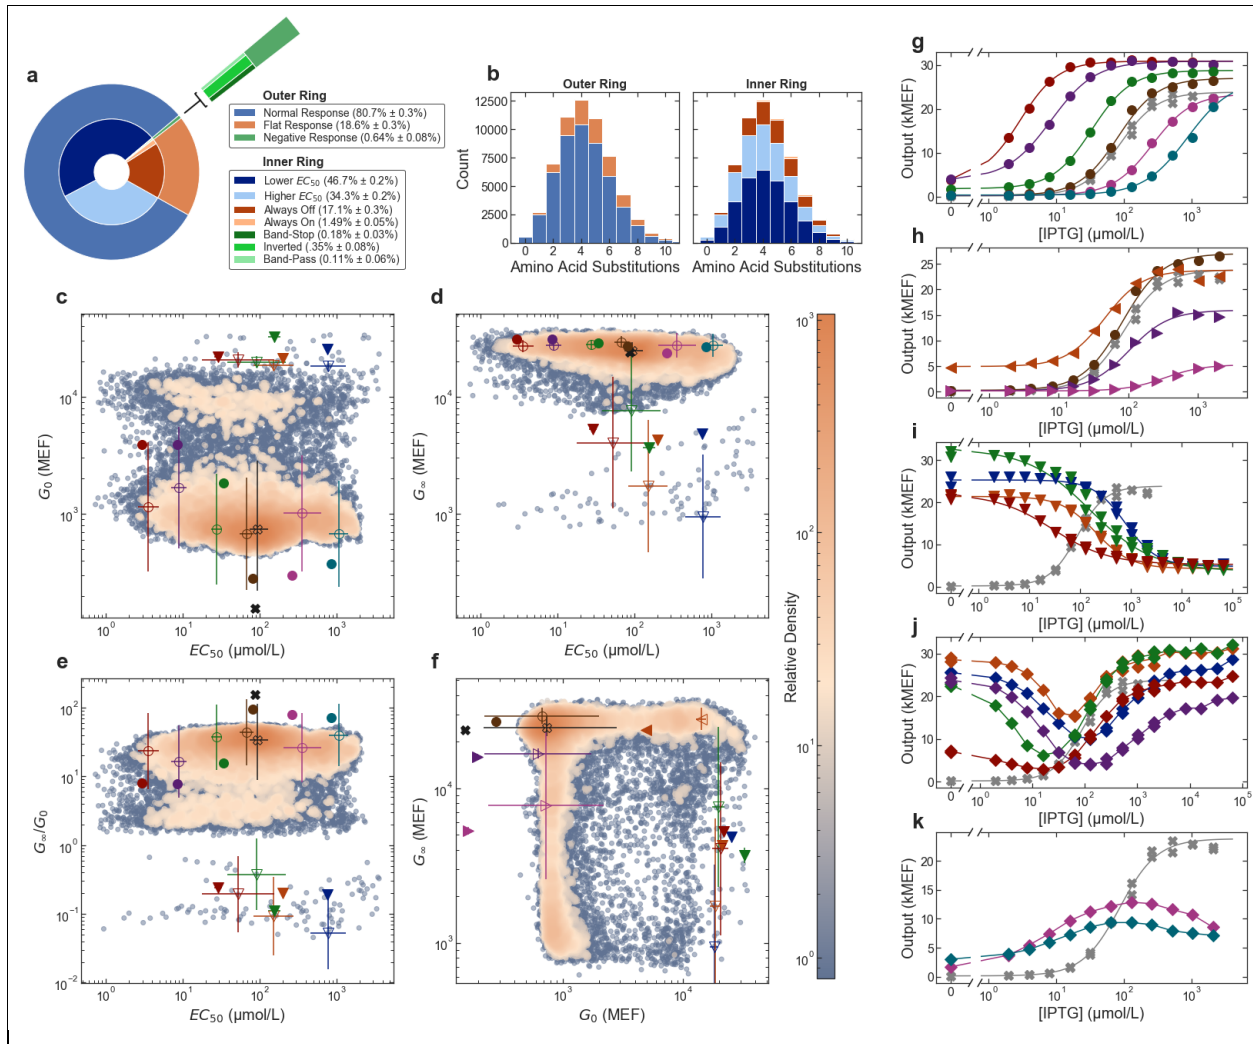

**Fig. 2 | Diversity of sensor phenotypes within the sensor library.** **a,b**, Proportion of sensor phenotypes in the library (**a**) and as a function of the number of amino acid substitutions (**b**). The plots in **a** and **b** share the same legend. The outer ring of **a** and the left panel of **b** show the proportion of sensors with dose-response curves that are normal (similar to wild-type), flat-response, or with negative response. The inner ring of **a** and the right panel of **b** show more detailed descriptors of sensors phenotypes. **c-f**, 2D plots of Hill equation parameters for all sensors in the library. Each colormap indicates the relative density of sensors within the measured phenotype space. Points plotted with error bars show results for sensors with matching flow cytometry data in **g-i**, with a black 'X' indicating the wild type. Open symbols are results from barcode sequencing; solid symbols are results from flow cytometry. In **c-e**,  $EC_{50}$  values for the barcode sequencing results for normal-response sensors (open circles) are corrected for a slight systematic bias for comparison with flow cytometry results (filled circles, see Extended Data Fig. 5). **g-k**, Dose-response curves measured using flow cytometry to verify sensor phenotypes, including sensors engineered with defined  $EC_{50}$  (**g**) and  $G_0$  or  $G_{\infty}$  (**h**). Several inverted sensors (**i**) and novel sensor phenotypes, including band-stop (**j**) and band-pass (**k**) sensors were also verified. In all plots,  $G_0$  and  $G_{\infty}$  are given in molecules of equivalent fluorophore (MEF), and the error bars indicate  $\pm$  one standard deviation.

1

2

1

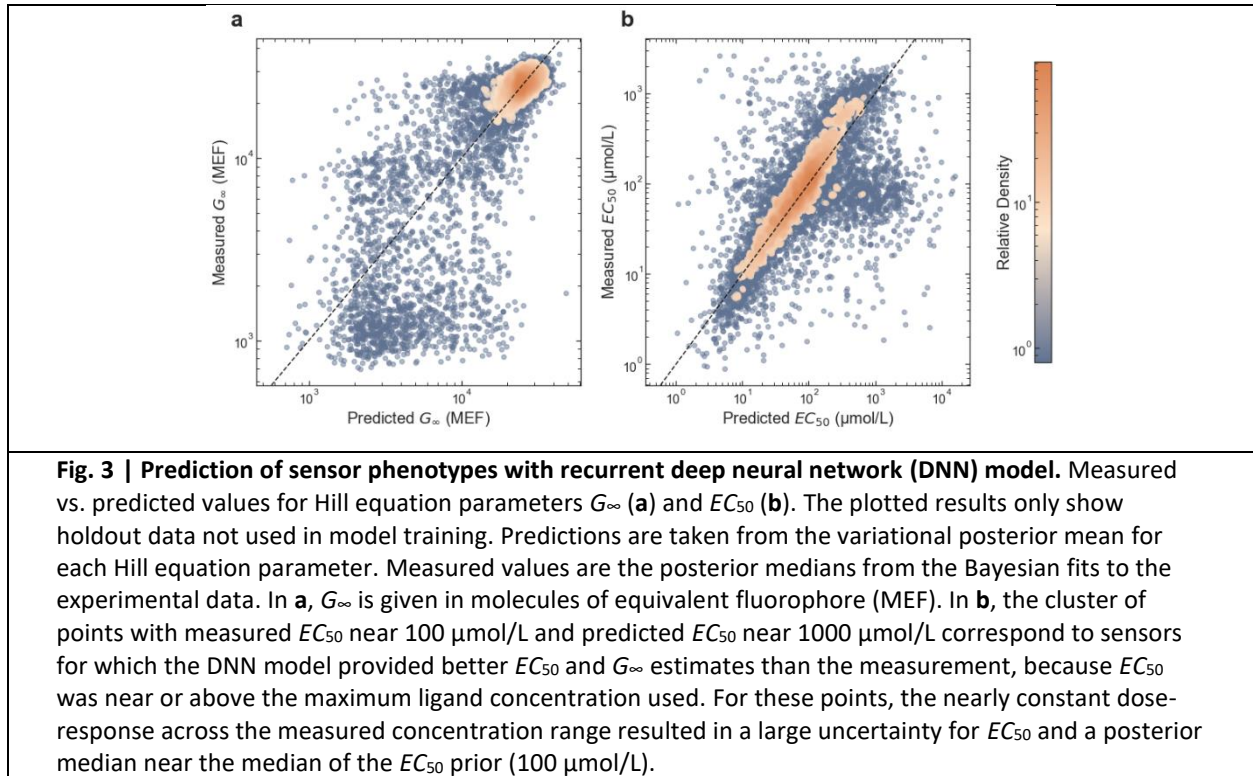

2



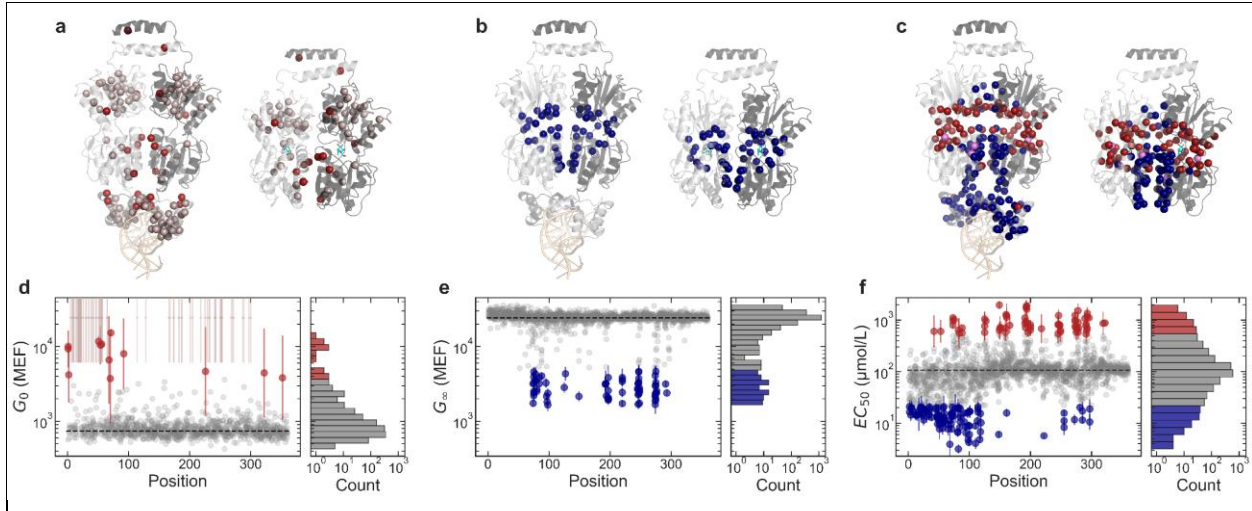

**Fig. 4 | Impact of substitutions on allosteric function.** **a-c**, Protein structures showing the locations of substitutions that affect each Hill equation parameter:  $G_0$  (**a**),  $G_\infty$  (**b**),  $EC_{50}$  (**c**). For each, the DNA-binding configuration is shown on the left (DNA in light orange, PDB ID: 1LBG) and the ligand-binding configuration is shown on the right (IPTG in cyan, PDB ID: 1LBH). Both configurations are shown with the view oriented along the protein dimer interface, with one monomer in light gray and the other monomer in dark gray. Colored spheres highlight residues where substitutions cause a greater than 5-fold change in the Hill equation parameter relative to the wild-type. Red spheres indicate residues where substitutions increase the parameter, and blue spheres indicate residues where substitutions decrease the parameter. At three residues (A82, I83, and F161), some substitutions decrease  $EC_{50}$ , while other substitutions increase  $EC_{50}$  (violet spheres in **c**). **d-f**, Effect of substitutions on  $G_0$  (**d**),  $G_\infty$  (**e**),  $EC_{50}$  (**f**). Scatter plots show the effect of each substitution as a function of position. Substitutions that change the parameter by less than 5-fold are shown as gray points. Substitutions that change the parameter by more than 5-fold are shown as red or blue points with error bars. In **a** and **d**, gray-pink spheres and points indicate positions for substitutions shown by previous work to result in constitutively high  $G(L)^{18,19}$ . Histograms to the right of each scatter plot show the overall distribution of substitution effects.  $G_0$  and  $G_\infty$  are given in molecules of equivalent fluorophore (MEF). Error bars indicate  $\pm$  one standard deviation.

1



## 1 Extended data figures and captions

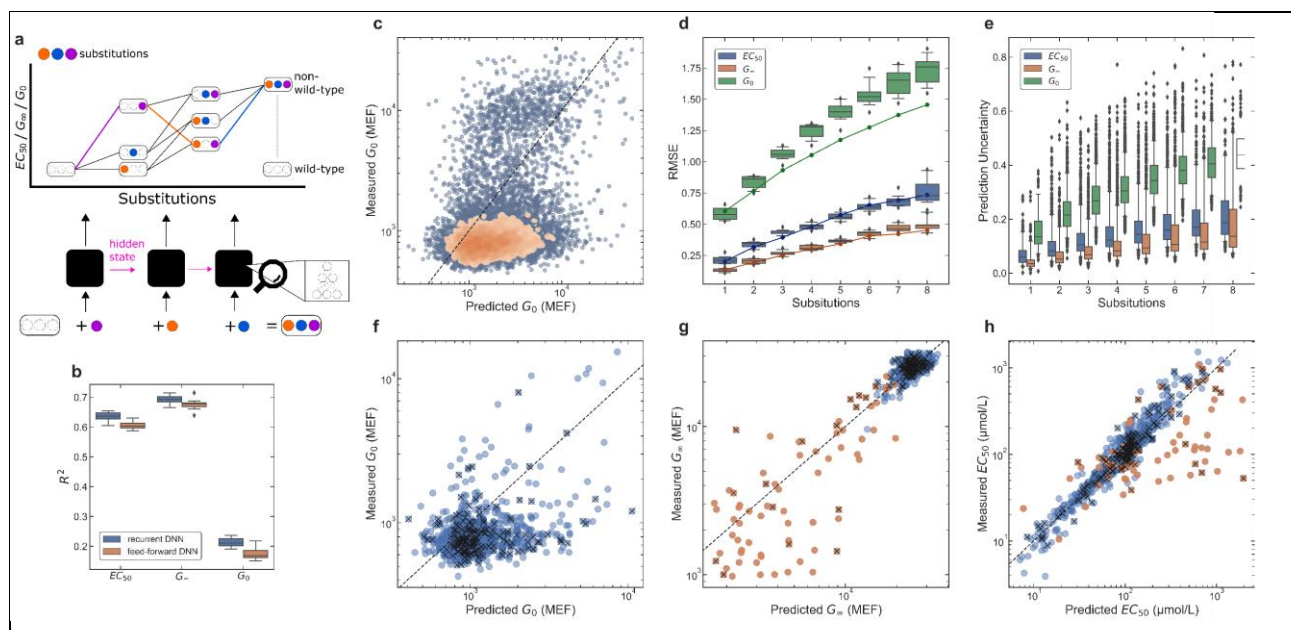

**Extended Data Fig. 1 | Deep neural network (DNN) model evaluation.** **a**, Schematic illustration of recurrent deep neural network model architecture. Using the wild-type sequence as a starting point, the model predicts the Hill equation parameters for non-wild-type sequences by composing the individual parameter changes due to sequential substitutions along a mutational path. These changes are then added together to predict the final parameter values. All paths to a non-wild-type sequence converge to the same value, and this fact is leveraged to build a recurrent neural network model that learns to predict the individual substitution effects, given previous substitutions. Potential non-additive effects are captured by the hidden state of the model, which predicts the change in parameter value for the most recent substitution and serves as a set of latent variables for predicting subsequent substitutions. Note that sensors with intermediate sequences may be present in the library, but this is not necessary to train the model. The model will still learn to predict intermediate steps in the path, even if that data is not present. **b**, Performance of recurrent and feed-forward DNN models. The boxplot summarizes the  $R^2$  values for ten cross-validation tests for each model. The recurrent DNN model generally outperforms the feed-forward model, giving higher  $R^2$  values for each of the Hill equation parameters. **c**, Measured vs. predicted values for Hill equation parameter  $G_0$  are plotted with a colormap indicating the relative density of data. Predictions were taken from the variational posterior mean for  $G_0$ . Results are plotted only for the holdout data not used in model training. **d**, Model prediction error for each Hill equation parameter as a function of the number of substitutions from the wild-type sequence. Prediction error is shown as the root-mean-square error (RMSE) for the base-ten logarithm of each Hill equation parameter. The boxplot shows the distribution of RMSE values from the ten cross-validation tests for the recurrent DNN model. Solid lines show the RMSE for the holdout data not used for training. **e**, Model prediction uncertainty for the base-ten logarithm of each Hill equation parameter as a function of the number of substitutions from the wild-type sequence. The boxplot shows the distribution of posterior standard deviation values for the set of sensors with the indicated number of substitutions. Both the RMSE (**d**) and the prediction uncertainty (**e**) increase with increasing mutational distance from the wild-type sequence. **f-h**, Measured vs. predicted values for the effect of single substitutions on Hill equation parameters  $G_0$  (**f**),  $G_\infty$  (**g**), and  $EC_{50}$  (**h**). Blue symbols show data for all of the single-substitution sensors in the library. Orange symbols show data for sensors with a high uncertainty for the measured  $EC_{50}$  ( $\text{std}(\log_{10}(EC_{50})) > 0.35$ ). The  $EC_{50}$  uncertainty for those sensors was relatively high either because  $G_\infty$  was similar to  $G_0$  and/or because  $EC_{50}$  was near or above the maximum ligand concentration used (2048  $\mu\text{mol/L}$ ). For those sensors, in the analysis of single-substitution effects, the DNN model result for  $G_\infty$  and  $EC_{50}$  was used in place of the experimental result. Points marked with an 'x' were in the holdout data not used for model training. In all plots,  $G_0$  and  $G_\infty$  are given in molecules of equivalent fluorophore (MEF).

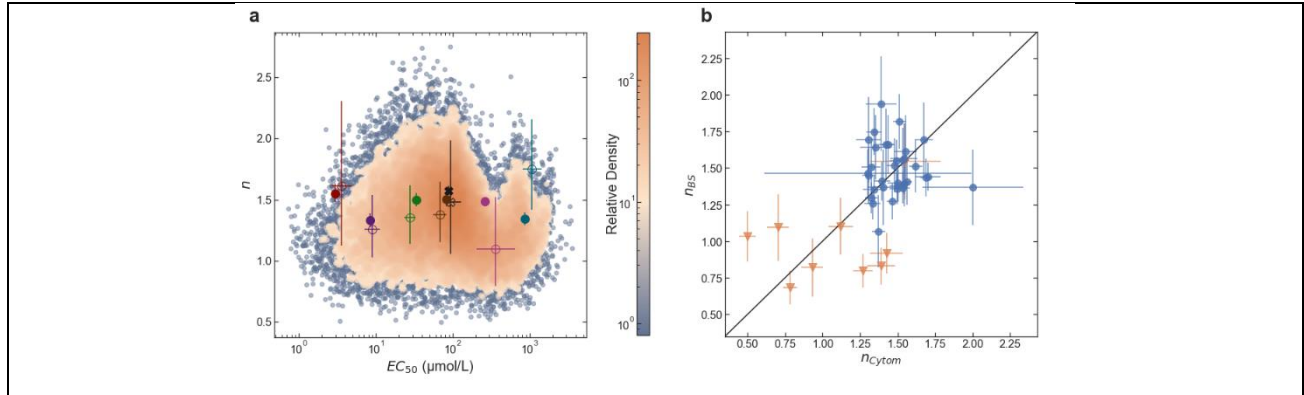

**Extended Data Fig. 2 | Data for the  $n$  parameter of the Hill equation.** **a**, 2D plot of Hill equation  $n$  parameter vs.  $EC_{50}$  for all sensors in the library. The density colormap indicates the relative density of sensors within the measured phenotype space. Plotted points show results for the verified phenotypes plotted in Fig. 2g. The wild-type phenotype is marked with a black 'X'. Open symbols are the results from barcode sequencing; solid symbols are the results from flow cytometry.  $EC_{50}$  values for the barcode sequencing results (open circles) are corrected for a slight systematic bias for comparison with the flow cytometry results (filled circles, see Extended Data Fig. 5). **b**, Comparison between the  $n$  parameter from barcode sequencing ( $n_{BS}$ ) and from flow cytometry ( $n_{Cytom}$ ). Blue circular symbols show data for normal-phenotype sensors (sensors with  $G_0$  and  $G_\infty$  near wild-type values) and orange triangular symbols show data for inverted sensors. Inverted sensors generally have a lower  $n$  parameter than normal phenotype sensors, a trend that is captured by both measurement methods. In both **a** and **b**, the plotted points and error bars indicate the posterior median and standard deviation from the Bayesian inference.

1

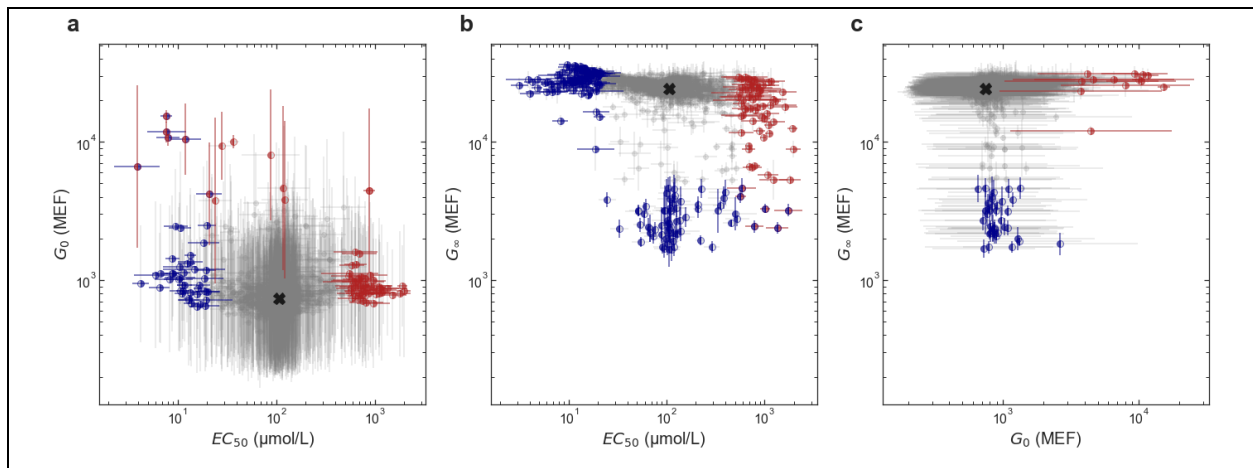

**Extended Data Fig. 3 | Multiparametric impact of substitutions on allosteric function.** The effect of single amino acid substitutions on the Hill equation parameters are plotted to show the joint effect of each substitution on two Hill equation parameters. **a**,  $G_0$  vs.  $EC_{50}$ . **b**,  $G_\infty$  vs.  $EC_{50}$ . **c**,  $G_\infty$  vs.  $G_0$ . In each plot, substitutions that change both Hill equation parameters by less than 5-fold are shown as light gray points, and substitutions that change one or both Hill equation parameters by more than 5-fold are shown as red or blue points with error bars. As in Fig. 4, red indicates a decrease in Hill equation parameter and blue indicates an increase. The left half of each symbol and the y-error bar are colored based on the y-axis parameter; the right half of each symbol and the x-error bars are colored based on the x-axis parameter. The wild-type phenotype is indicated with a black 'X' in each plot. In all plots,  $G_0$  and  $G_\infty$  are given in molecules of equivalent fluorophore (MEF). Error bars indicate  $\pm$  one standard deviation.

2

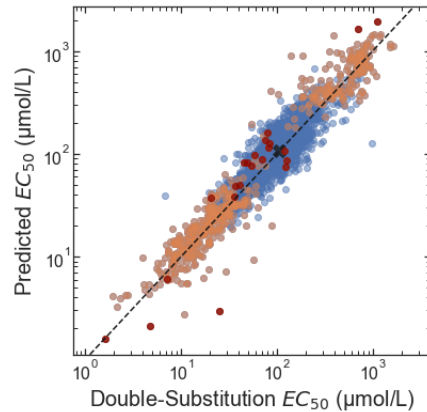

**Extended Data Fig. 4 | Log-additivity of  $EC_{50}$ .** The predicted  $EC_{50}$  for double substitutions (y-axis) was calculated from single-substitution  $EC_{50}$  values assuming log-additivity relative to the wild-type  $EC_{50}$ :  $(EC_{50,AB} - EC_{50,wt}) = (EC_{50,A} - EC_{50,wt}) + (EC_{50,B} - EC_{50,wt})$ , where 'wt' indicates the wild-type, 'A' and 'B' indicate the single-substitutions, and 'AB' indicates the double substitution. The actual double-substitution  $EC_{50}$  (x-axis) is from the experimental measurement (barcode sequencing). Orange points mark double substitutions in which one of the single substitutions causes a greater than 3-fold change in  $EC_{50}$ . Dark red points mark double substitutions in which both single substitutions cause a greater than 3-fold change in  $EC_{50}$ . The wild-type  $EC_{50}$  is marked with a black 'X'. For this analysis, only experimental data was used (no results from the DNN model). Also, only data from sensors with low  $EC_{50}$  uncertainty ( $\text{std}(\log_{10}(EC_{50})) < 0.35$ ) were used.

1

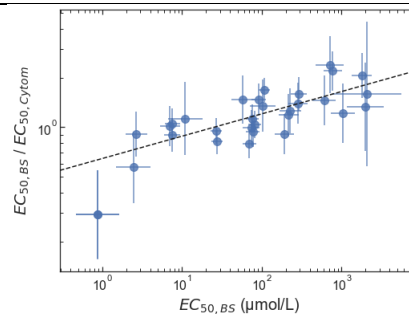

**Extended Data Fig. 5 | Accuracy of  $EC_{50}$  from barcode sequencing measurements.** The ratio of the  $EC_{50}$  determined by barcode sequencing ( $EC_{50,BS}$ ) to the  $EC_{50}$  determined by cytometry ( $EC_{50,Cytom}$ ) is plotted vs.  $EC_{50,BS}$  for 31 sensors with  $G_0$  and  $G_\infty$  near the wild-type values. For sensors with  $EC_{50}$  greater than  $1 \mu\text{mol/L}$ , the root-mean-square (RMS) difference between  $\log_{10}(EC_{50,BS})$  and  $\log_{10}(EC_{50,Cytom})$  is 0.16, corresponding to an relative accuracy of 1.45-fold (i.e.  $10^{0.16}$ ). The data show a slight systematic bias, with the barcode sequencing method underestimating  $EC_{50}$  when it is less than  $25 \mu\text{mol/L}$  and overestimating  $EC_{50}$  when it is greater than  $25 \mu\text{mol/L}$ . The most accurate results are obtained by correcting the barcode sequencing result based on a fit to this bias (dashed line in the figure). After applying this correction, the RMS difference between  $\log_{10}(EC_{50,BS})$  and  $\log_{10}(EC_{50,Cytom})$  is 0.097, corresponding to an relative accuracy of 1.25-fold.

2

3

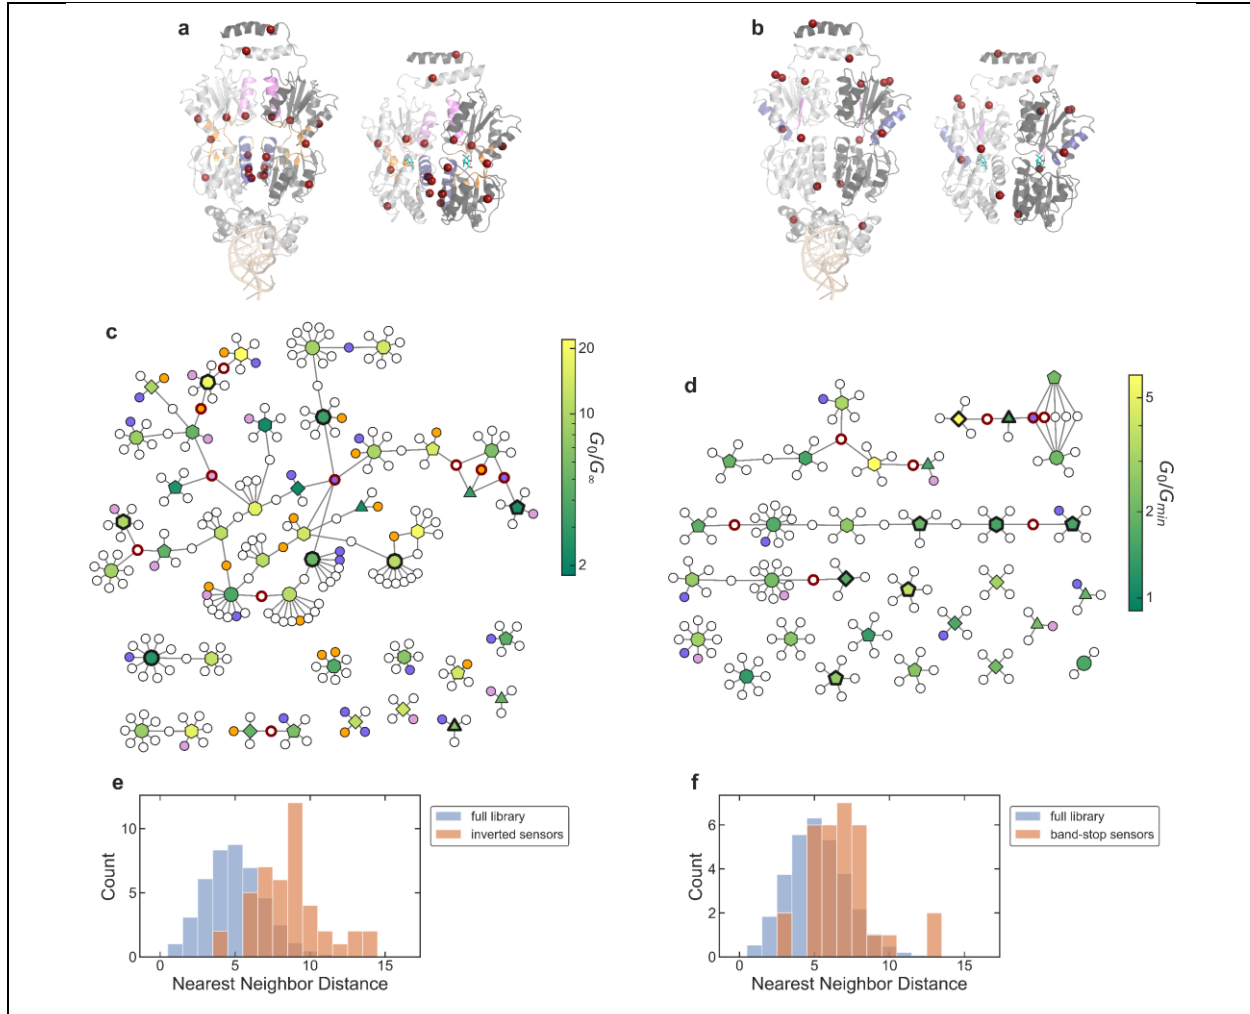

**Extended Data Fig. 6 | Analysis of inverted and band-stop genotypes.** **a,b**, Location of substitutions associated with strongly inverted (**a**) and strong band-stop (**b**) sensors. For each plot, the DNA-binding configuration of LacI is shown on the left (PDB ID: 1LGB), with the DNA operator at the bottom in light orange; the ligand-binding configuration is shown on the right (PDB ID: 1LBH), with IPTG in cyan. Both configurations are shown with the view oriented along the protein dimer interface, with one monomer in light gray and the other monomer in dark gray. The locations of associated (i.e. high-frequency) substitutions are highlighted as red spheres, and structural domains where inverted or band-stop sensors have substitutions at a significantly higher frequency than the full library are shaded with different colors. For strongly inverted sensors (**a**), helix 5 is shaded blue, helix 11 is shaded violet, and the residues near the ligand-binding pocket are shaded orange. For strong band-stop sensors (**b**), helix 9 is shaded blue, and strand J is shaded violet. **c,d**, Network diagrams showing relatedness among genotypes for strongly inverted (**c**) and strong band-stop (**d**) sensors. Within each network diagram, sensors are represented by polygon-shaped nodes, with a colormap indicating the  $G_0/G_\infty$  or  $G_0/G_{min}$  ratio (see Fig. 1e). The number of sides of the polygon indicates the number of substitutions relative to the wild-type, and bold outlines indicate sensors that were verified with flow cytometry. Smaller circular nodes represent substitutions, with lines showing the substitutions for each sensor. Bold red outlines on the substitution nodes indicate the associated substitutions shown as spheres in **a-b**, and the shading of substitution nodes matches the shading used to highlight structural domains in **a-b**. **e,f**, Nearest neighbor distance histograms. In each plot, the orange bars show the distribution of nearest neighbor Hamming distance for the amino acid sequences for strongly inverted (**e**) and strong band-stop (**f**) sensors, and the blue bars show the distribution of nearest neighbor Hamming distance for a similar number of randomly selected sequences from the full library. The full-library histograms (blue bars) are averaged over 1000 iterations of randomly selected sequences.

1

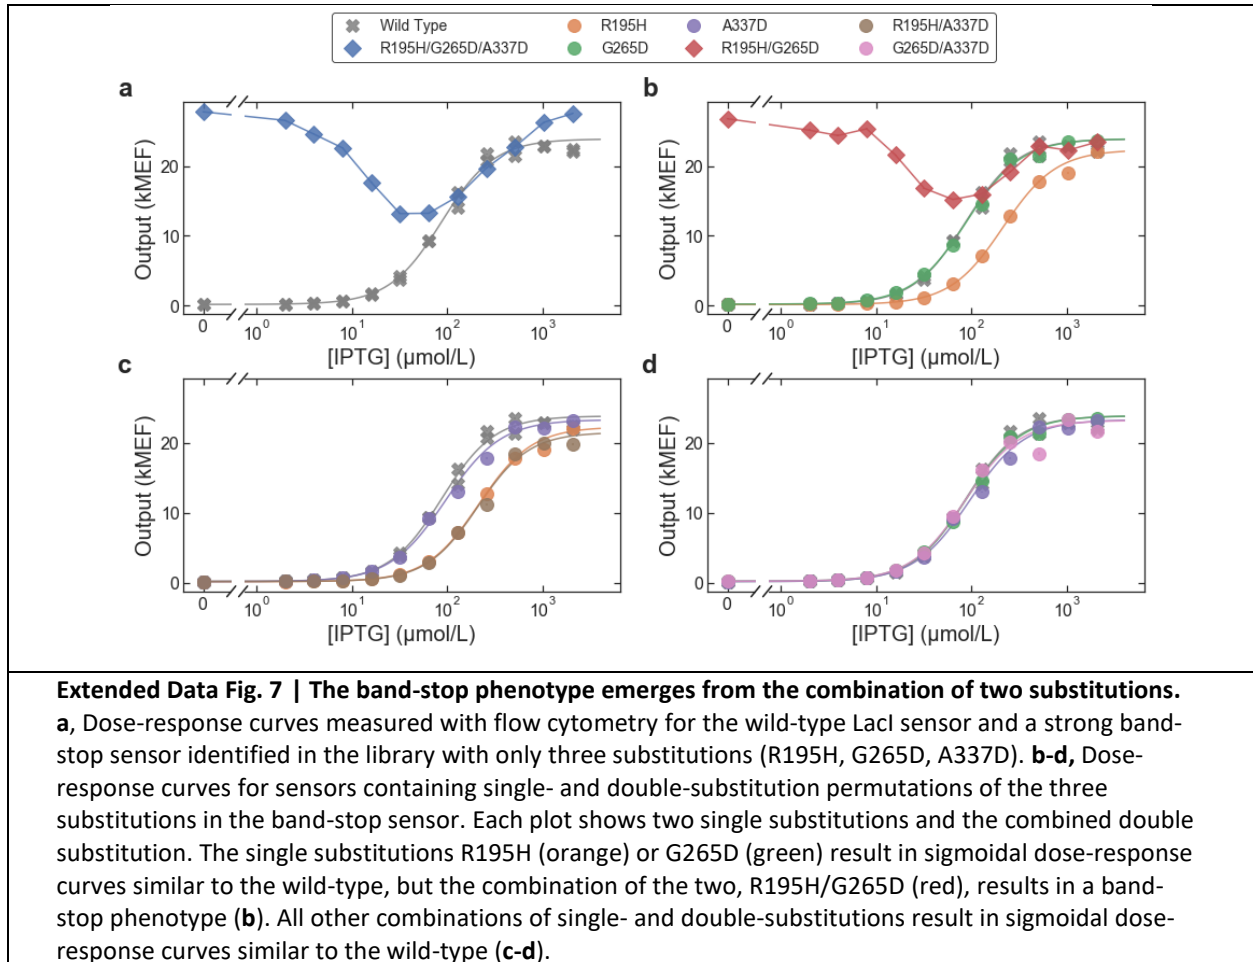

2

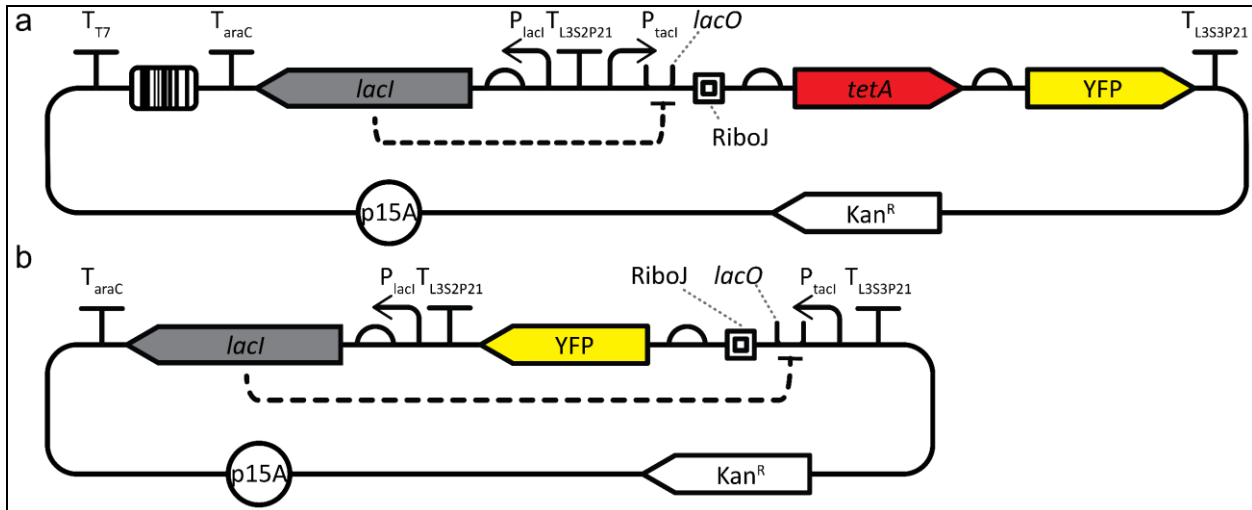

**Extended Data Fig. 8 | Plasmid maps for the two plasmids used in this work.** Both plasmids contained the p15A origin of replication (p15A), kanamycin resistance gene (Kan<sup>R</sup>), and *lacI* CDS. In both plasmids, the encoded LacI protein transcriptionally regulated an output that was driven by the P<sub>tacI</sub> promoter, *lacO* operator, and RiboJ transcriptional insulator. **a**, The Library Plasmid was used for the barcode sequencing fitness measurements of the sensor library. The sensor library, including sensors and corresponding barcodes, was cloned into the Library Plasmid. Sensors in the Library Plasmid regulated the expression of a tetracycline resistance gene, *tetA*. The Library Plasmid also encoded YFP, which was used during cloning. The expression of *tetA* (and YFP) from the Library Plasmid was transcriptionally terminated with T<sub>L353P21</sub>. **b**, The Verification Plasmid was used to verify the dose-response curves of approximately 120 sensors from the library. To verify the dose-response curve of a sensor, the CDS for that sensor was chemically synthesized and cloned into the Verification Plasmid, where the sensor regulated the expression of YFP. The dose-response curve was then measured using flow cytometry.



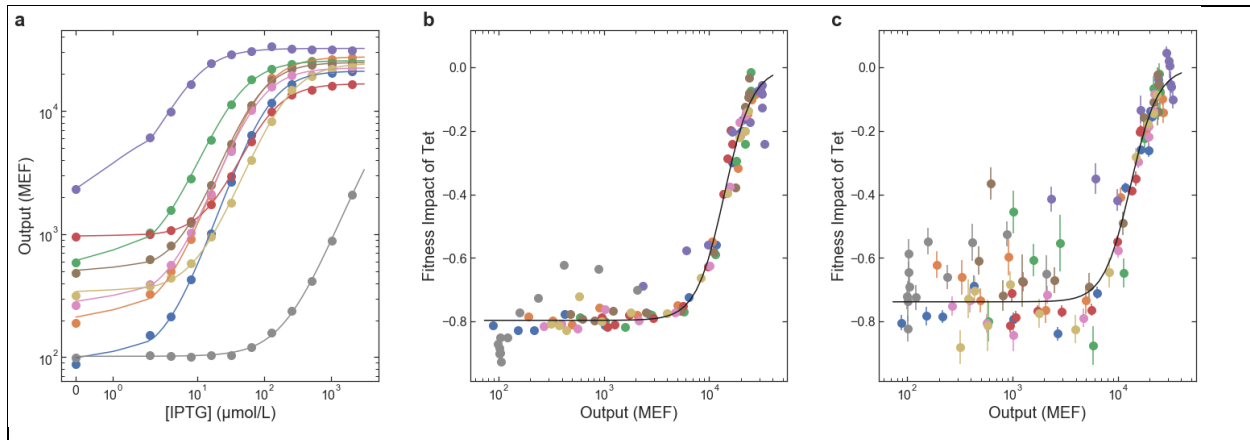

**Extended Data Fig. 9 | Calibration data for the determination of dose-response curves using barcode sequencing.** **a**, Dose-response curves measured with flow cytometry for nine sensors used to calibrate sensor output with fitness. **b,c**, The fitness impact of tetracycline (from the barcode sequencing) plotted vs. sensor output (from flow cytometry). The fitness impact of tetracycline is defined as the decrease in fitness (*E. coli* growth rate) measured with tetracycline vs. without tetracycline normalized by the fitness measured without tetracycline, i.e.  $(\mu^{tet}/\mu^0 - 1)$  from equation (2). **b**, Data from a small-scale test library containing only the calibration sensors. **c**, Data from measurement of the full library. Results for different calibration sensors are shown with different colored symbols. The solid black lines in **b-c** show the results of a fit using equation (2). Error bars indicate  $\pm$  one standard deviation. The results for the full library measurement are noisier than the small-scale test because of the lower read count per sensor (approximately 100-fold difference), but the general trend and the fits for both results are similar.

1

## 2 Methods

### 3 Strain, plasmid, and library construction

4 All reported measurements were completed using *E. coli* strain MG1655 $\Delta$ *lac* (described previously)<sup>28</sup>.

5 Briefly, strain MG1655 $\Delta$ *lac* was constructed by replacing the lactose operon of *E. coli* strain MG1655  
6 (ATCC #47076) with the bleomycin resistance gene from *Streptoalloteichus hindustanus* (*Shble*).

7 Two plasmids were used for this work: a Library Plasmid (Extended Data Fig. 8a) used for the  
8 measurement of the genotype and phenotype of the entire library, and a Verification Plasmid (Extended  
9 Data Fig. 8b) used to verify the function of 120 sensors from the library chosen to test the accuracy of  
10 the landscape measurement and to demonstrate the range of sensor function.

11 The Library Plasmid contained the *lacI* CDS and the lactose operator (*lacO*) regulating the transcription  
12 of a tetracycline resistance gene, *tetA*, which, in the presence of tetracycline, confers a measurable  
13 change in fitness connected with the sensor output. The Library Plasmid also encoded Enhanced Yellow  
14 Fluorescent Protein (YFP), which was used to select a starting library of sensors with low gene  
15 expression in the absence of IPTG using FACS (Sony SH800S Cell Sorter).

1 The Verification Plasmid contained a similar system in which *lacI* and *lacO* regulate the transcription of  
2 only YFP. The Verification Plasmid was used to measure dose-response curve of each sensor using flow  
3 cytometry. Each sensor chosen from the library for verification was chemically synthesized (Twist  
4 Biosciences), inserted into the Verification Plasmid, and transformed into *E. coli* strain MG1655 $\Delta$ *lac* for  
5 flow cytometry measurements to confirm the dose-response curve inferred from the barcode  
6 sequencing measurements.

7 The sensor library was generated by error-prone PCR of the wild-type *lacI* CDS from the genome of  
8 MG1655. The library was inserted into the Library Plasmid along with randomly synthesized DNA  
9 barcodes. Each barcode consisted of 54 random nucleotides introduced with PCR primers (Integrated  
10 DNA Technologies). Most of the sensors in the initial library had high  $G(0)$ , i.e. the  $I^-$  phenotype<sup>18</sup>. To  
11 generate a library of mostly functional allosteric sensors, we used fluorescence activated cell sorting  
12 (FACS) to select a portion of the library with low fluorescence in the absence of ligand (Sony SH800S Cell  
13 Sorter). To allow comprehensive long-read sequencing of the library (PacBio sequel II, see below), we  
14 further reduced the library size by dilution of the FACS-selected library to create a population bottleneck  
15 of the desired size. For the work reported here, we used a library of approximately  $2 \times 10^5$  sensors  
16 (determined by serial plating and colony counting).

### 17 *E. coli* culture conditions

18 *E. coli* cultures were grown in a rich M9 media comprising M9 salts (3 g/L  $\text{KH}_2\text{PO}_4$ , 6.78 g/L  $\text{Na}_2\text{HPO}_4$ ,  
19 0.5 g/L NaCl, 1 g/L  $\text{NH}_4\text{Cl}$ ) supplemented with 0.1 mmol/L  $\text{CaCl}_2$ , 2 mmol/L  $\text{MgSO}_4$ , 4 % glycerol, and  
20 20 g/L casamino acids. When required for plasmid maintenance, media was supplemented with  
21 50  $\mu\text{g}/\text{mL}$  kanamycin.

22 A fully automated microbial growth and measurement system facilitated the simultaneous  
23 measurement of the library across 24 chemical environments. This system prepared all growth  
24 conditions, including the addition of IPTG (ligand) and tetracycline. Bacterial cultures were grown in  
25 0.5 mL of media in clear-bottom polystyrene 96-well plates with 1.1 mL volume square wells (4titude,  
26 4ti-0255). Growth plates were sealed with a gas permeable membrane (4titude, 4ti-0598) and incubated  
27 at 37 °C (with a 1 °C gradient to minimize condensation) while shaking at 807 double-orbital cycles per  
28 minute in a plate reader (BioTek, Neo2SM). Optical density at 600 nm ( $\text{OD}_{600}$ ) was measured every  
29 5 minutes during growth.



## 1 Growth protocol for landscape measurement

2 To begin the LacI genotype-phenotype landscape measurement, a culture of *E. coli* containing the  
3 sensor library was mixed at a 99:1 ratio with a culture of an *E. coli* spike-in control with known fitness  
4 (see below). The culture was loaded into the automated microbial growth and measurement system  
5 where it was distributed across a 96-well plate and then grown to stationary phase (12 hours). Cultures  
6 were then diluted 50-fold into a new 96-well plate, Growth Plate 1, containing 11 rows with a 2-fold  
7 serial dilution gradient of IPTG with concentrations ranging from 2  $\mu\text{mol/L}$  to 2048  $\mu\text{mol/L}$  plus one row  
8 without IPTG. Growth in IPTG allowed the sensors to reach a steady state, including basal expression of  
9 tetA in each IPTG concentration. Growth Plate 1 was grown for 160 minutes, corresponding to  
10 approximately 3.3 generations, and then diluted 10-fold into Growth Plate 2. Growth Plate 2 contained  
11 the same IPTG gradient as Growth Plate 1 with the addition of tetracycline (20  $\mu\text{g/mL}$ ) to half of the  
12 wells, resulting in 24 chemical environments, with 4 duplicate wells for each environment. Growth  
13 Plate 2 was grown for 160 minutes and then diluted 10-fold into Growth Plate 3, which contained the  
14 same 24 chemical environments as Growth Plate 2. This process was repeated for Growth Plate 4, which  
15 also contained the same 24 chemical environments. The total growth time for the fitness measurements  
16 in the 24 chemical environments, 480 minutes across Growth Plates 2-4, corresponded to approximately  
17 10 generations for the fastest-growing cultures. The 50-fold dilution factor from stationary phase into  
18 Growth Plate 1 and the 160 minute growth time per plate were chosen to maintain the cultures in  
19 exponential growth for the entire 480 minutes.

20 After each growth plate was used to seed the subsequent plate (or at the end of 160 minutes for  
21 Growth Plate 4), the remaining culture volumes for each chemical environment (approximately  
22 450  $\mu\text{L}$ /well, four duplicates per plate) were combined and pelleted by centrifugation (3878  $g$  for  
23 10 minutes at 23  $^{\circ}\text{C}$ ). Plasmid DNA was then extracted with a custom method using reagents from the  
24 QIAprep Miniprep Kit (Qiagen cat. #27104) on an automated liquid handler equipped with a positive-  
25 pressure filter press.

## 26 Barcode sequencing

27 After plasmid extraction, each set of 24 plasmid DNA samples was prepared for barcode sequencing  
28 using a custom sequencing sample preparation method on a second automated liquid handler. Briefly,  
29 the plasmid DNA was linearized with Apal restriction enzyme. Then, a 3-cycle PCR was performed to  
30 attach sample multiplexing tags to the resulting amplicons so the different samples could be  
31 distinguished when pooled and run on the same sequencing flow cell. Eight forward index primers and

1 12 reverse index primers were used to label the amplicons from each sample across the 24 chemical  
2 environments and the four time points. After a magnetic-bead-based cleanup step, a second, 15-cycle  
3 PCR was run to attach the standard Illumina paired-end adapter sequences and to amplify the resulting  
4 amplicons for sequencing. After a second magnetic-bead-based cleanup, the 24 samples from each time  
5 point were pooled and stored at 4 °C until sequencing. For sequencing, DNA was diluted to a final  
6 concentration of approximately 5 nmol/L and combined with 20 % phiX control DNA. DNA from each of  
7 the 4 time points was sequenced in a separate lane on an Illumina HiSeqX using paired-end mode with  
8 150 bp in each direction.

9 To count DNA barcodes and estimate the fitness associated with each sensor, the sequencing data was  
10 analyzed using custom software written in C# and Python, and the Bartender1.1 barcode clustering  
11 algorithm<sup>29</sup>. Briefly, the raw sequences were kept for further analysis if they had the appropriate  
12 sequences for the sample index tags and the bases flanking the barcode regions, and if the mean quality  
13 score for the barcode sequence region was greater than 30. The Bartender1.1 clustering algorithm was  
14 then used to identify and count the barcodes from each sample. Barcode sequencing reads were then  
15 sorted based on the sample multiplexing tags and barcode read counts were corrected for PCR  
16 jackpotting effects<sup>30</sup>.

### 17 Long-read sequencing

18 PacBio circular consensus HiFi sequencing was used to sequence the full Library Plasmid associated with  
19 each sensor. To achieve a high depth of long-read sequencing coverage of the full plasmid, two separate  
20 samples of the library plasmid DNA were prepared and sequenced. For both samples, the library plasmid  
21 DNA was extracted using miniprep kits. The plasmid DNA was linearized and dephosphorylated before  
22 submitting for sequencing (University of Maryland Institute for Genome Sciences).

23 Data was obtained from two PacBio Sequel II sequencing runs, with a total of 2 509 064 HiFi reads. The  
24 HiFi sequencing data was used to identify the *lacI* CDS for each sensor in the library by matching the *lacI*  
25 CDS to the corresponding DNA barcode. In addition, the full plasmid sequence was used to screen for  
26 sensors encoded in plasmids with unintended mutations in other plasmid regions that affected the  
27 measurement, and those sensors were excluded from quantitative phenotypic analyses.

## 1 Fitness measurement

2 The experimental approach for this work was designed to maintain bacterial cultures in exponential  
3 growth phase for the full duration of the measurements. So, in all analysis, the Malthusian definition of  
4 fitness was used, i.e. fitness is the exponential growth rate<sup>31</sup>.

5 The fitness associated with each sensor was calculated from the change in the relative abundance of  
6 DNA barcodes over time. A spike-in control with known fitness was used to normalize the DNA barcode  
7 count data to enable the determination of the absolute fitness for each sensor in the library. The spike-  
8 in control was an *E. coli* clone containing a plasmid with a sensor with constitutively high  $G(L)$ , i.e. the *I*-  
9 phenotype<sup>18</sup>. The fitness of the spike-in control was determined from OD<sub>600</sub> data acquired during growth  
10 of clonal cultures grown with the same automated growth protocol as used for the library fitness  
11 measurement. The fitness of the spike-in control was measured in all 24 growth environments and was  
12 independent of IPTG concentration but was slightly lower with tetracycline than without tetracycline.  
13 For each sensor in each of the 24 chemical environments, the ratio of the barcode read count to the  
14 spike-in read count was fit to a function assuming exponential growth and a lag in the onset of the  
15 fitness impact of tetracycline. The fitness associated with each sensor in each of the 24 chemical  
16 environments was determined as a parameter in the corresponding least-squares fit.

## 17 Dose-response curve measurement

18 The Library Plasmid and Verification Plasmid were engineered to provide two independent  
19 measurements of the dose-response curve for LacI sensors. First, in the Library Plasmid, the sensor  
20 regulates the expression of a tetracycline resistance gene (*tetA*) that enables determination of the dose-  
21 response from barcode sequencing data by comparing the fitness measured with tetracycline to the  
22 fitness measured without tetracycline. Second, in the Verification Plasmid, the sensor regulates the  
23 expression of a fluorescent protein (YFP) that enables direct measurement of the sensor dose-response  
24 curve with flow cytometry.

25 A set of nine randomly selected sensors were used to calibrate the estimation of sensor output from the  
26 barcode-sequencing fitness measurements (Extended Data Fig. 9). The calibration data consisted of the  
27 fitness data for each calibration sensor from the library barcode sequencing measurement (using the  
28 Library Plasmid) and flow cytometry data for each calibration sensor prepared as a clonal culture (using  
29 the Verification Plasmid). This data was fit to a Hill equation model for the fitness impact of tetracycline  
30 as a function of the sensor output gene expression level,  $G$ :

$$\frac{\mu^{tet}}{\mu^0} - 1 = \Delta f \left( \frac{G^{n_f}}{G_{50}^{n_f} + G^{n_f}} - 1 \right) \quad (2)$$

1  
2 where  $\mu^{tet}$  is the fitness with tetracycline,  $\mu^0$  is the fitness without tetracycline,  $\Delta f$  is the maximal fitness  
3 impact of tetracycline (when  $G = 0$ ),  $G_{50}$  is the sensor output level that produces a 50 % recovery in  
4 fitness, and  $n_f$  characterizes the steepness of the fitness calibration curve. Because the fitness calibration  
5 curve, equation (2), is nonlinear, it cannot be directly inverted to give a sensor output value for all  
6 possible fitness measurements. So, two Bayesian inference models were used to estimate the dose-  
7 response curves for every sensor in the library using the barcode sequencing fitness measurements.  
8 Both inference models used equation (2) to represent the relationship between fitness and sensor  
9 output. The parameters  $\Delta f$ ,  $G_{50}$ , and  $n_f$  were included in both inference models as parameters with  
10 informative priors. Priors for  $G_{50}$  and  $n_f$  were based on the results of the fit to the fitness calibration data  
11 (Extended Data Fig. 9):  $G_{50} \sim \text{normal}(\text{mean}=13\ 330, \text{std}=500)$ ,  $n_f \sim \text{normal}(\text{mean}=3.24, \text{std}=0.29)$ . We  
12 chose the prior for  $\Delta f$  based on an examination of  $\mu^{tet}/\mu^0 - 1$  measured with zero IPTG:  $\Delta f \sim$   
13 exponentially-modified-normal(mean=0.720, std=0.015, rate=14). The use of a prior for  $\Delta f$  with a broad  
14 right-side tail was important to accommodate sensors in the library for which  $\mu^{tet}/\mu^0 - 1$  was  
15 systematically less than -0.722.

16 The first Bayesian inference model assumed that the dose-response curve for each sensor was described  
17 by the Hill equation (see equation (1), above). The Hill equation parameters for each sensor,  $G_\infty$ ,  $G_0$ ,  
18  $EC_{50}$ , and  $n$  and their associated uncertainties were determined using Bayesian parameter estimation by  
19 Markov Chain Monte Carlo (MCMC) sampling with PyStan<sup>32</sup>. Broad, flat priors were used for  $\log_{10}(G_0)$ ,  
20  $\log_{10}(G_\infty)$ , and  $\log_{10}(EC_{50})$ , with error function boundaries to constrain those parameter estimates to  
21 within the measurable range ( $100 \text{ MEF} \leq G_0$ ,  $G_\infty \leq 50\ 000 \text{ MEF}$ ;  $0.1 \text{ } \mu\text{mol/L} \leq EC_{50,i} \leq 40\ 000 \text{ } \mu\text{mol/L}$ ).  
22 For  $n_i$ , we used a gamma distribution prior with shape parameter of 4.0 and inverse scale parameter  
23 of 3.33.

24 The second Bayesian inference model was a non-parametric Gaussian process (GP) model that assumed  
25 only that the dose-response curve for each sensor was a smooth function of IPTG concentration<sup>33</sup>. The  
26 GP model was used to determine which sensors had band-pass or band-stop phenotypes. The GP model  
27 was also implemented using MCMC sampling with PyStan<sup>32</sup>.

1 Source code for both models is included in the software archive given at the end of this manuscript.  
2 MCMC sampling for both models was run with 4 independent chains, 1000 iterations per chain  
3 (500 warmup iterations), and the `adapt_delta` parameter set to 0.9.

4 For quantitative analyses of sensor phenotypes based on Hill equation parameters, data were only  
5 included if the results of the Hill equation model and the GP model agreed. More specifically, data were  
6 only used for those analyses if the median estimate for the dose-response curve from the Hill equation  
7 model was within the central 90 % credible interval from the GP model at all 12 IPTG concentrations.

### 8 Dose-response curve verification

9 Approximately 120 sensors from the library were chosen for flow cytometry verification of the dose-  
10 response curves. The CDSs of these sensors were chemically synthesized (Twist Bioscience), cloned into  
11 the Verification Plasmid, and then transformed into MG1655 $\Delta$ *ac*. Transformants were plated in LB  
12 supplemented with kanamycin and 0.2 % glucose. Sensor sequences were verified with Sanger  
13 sequencing (Psomagen USA). For flow cytometry measurements of dose-response curves, a culture of  
14 *E. coli* containing the Verification Plasmid with a chosen sensor sequence was distributed across 12 wells  
15 of a 96-well plate and grown to stationary phase using the automated microbial growth system. After  
16 growth to stationary phase, cultures were diluted 50-fold into a plate containing the same 12 IPTG  
17 concentrations used during the landscape measurement (0  $\mu$ mol/L to 2048  $\mu$ mol/L). In some cases,  
18 higher IPTG concentrations were used to capture the full dose-response curves of selected sensors  
19 (e.g. Fig. 2i-j). Cultures were then grown for 160 minutes ( $\sim$ 3.3 generations) before being diluted 10-fold  
20 into the same IPTG gradient and grown for another 160 minutes. Then, 5  $\mu$ L of each culture was diluted  
21 into 195  $\mu$ L of PBS supplemented with 170  $\mu$ g/mL chloramphenicol and incubated at room temperature  
22 for 30-60 minutes to halt the translation of YFP and allow extant YFP to mature in the cells.

23 Samples were measured on an Attune NxT flow cytometry with autosampler using a 488 nm excitation  
24 laser and a 530 nm  $\pm$  15 nm bandpass emission filter. Blank samples were measured with each batch of  
25 cell measurements, and an automated gating algorithm was used to discriminate cell events from non-  
26 cell events. With the Attune cytometer, the area and height parameters for each detection channel are  
27 calibrated to give the same value for singlet events. So, to identify singlet cell events and exclude  
28 multiplet cell events, we applied a second automated gating algorithm that selected only cells with side  
29 scatter area  $\cong$  side scatter height. All subsequent analysis was performed using the singlet cell event  
30 data. Fluorescence data was calibrated to molecules of equivalent fluorophore (MEF) using fluorescent  
31 calibration beads (Spherotech, part no. RCP-30-20A). The cytometer was programmed to measure a

1 25  $\mu$ L portion of each cell sample, and the 40-fold dilution used in the cytometry sample preparation  
2 resulted in approximately 20 000 singlet cell measurements per sample. The geometric mean of the YFP  
3 fluorescence was used as a summary statistic to represent the output level of each sensor as a function  
4 of the input ligand concentration, [IPTG].

### 5 Calculation of abundance for sensor phenotypes

6 The relative abundance of each sensor phenotype was estimated using the results of both Bayesian  
7 inference models (Hill equation and GP, Fig. 2a-b). Sensors were labeled as “flat response” if the Hill  
8 equation model and the GP model agreed (see above) and if the posterior probability for ( $G_0 > G_\infty$ ) was  
9 between 0.05 and 0.95 (from the Hill equation model inference). Sensors were labeled as having a  
10 negative response if the slope,  $\partial G/\partial L$ , was negative at one or more IPTG concentrations with 0.95 or  
11 higher posterior probability (from the GP model inference). To avoid false positives from end effects,  
12 this negative slope criteria was only applied for IPTG concentrations between 2  $\mu$ mol/L IPTG and  
13 1024  $\mu$ mol/L IPTG. Sensors were labeled as “always on” (the  $I^-$  phenotype from reference<sup>18</sup>) if they were  
14 flat-response and if the sensor output level at zero IPTG was greater than  $0.25 \times G_{\infty, wt}$  with 0.95 or  
15 higher posterior probability (from the GP model inference). Sensors were labeled as “always off”  
16 (the  $I^s$  phenotype from reference<sup>18</sup>) if they were flat-response but not always on. Sensors were labeled  
17 as band-stop or band-pass if the slope,  $\partial G/\partial L$ , was negative at some IPTG concentrations and positive at  
18 other IPTG concentrations, both with 0.95 or higher posterior probability (from the GP model inference).  
19 Band-stop and band-pass sensors were distinguished by the ordering of the negative-slope and positive-  
20 slope portions of the dose-response curves. Sensors that had a negative response (see above) but that  
21 were not band-pass or band-stop, were labeled as inverted. False-positive rates were estimated for each  
22 phenotypic category by manually examining the fitness data for sensors with less than three  
23 substitutions. Typical causes of false-positive phenotypic labeling included unusually high noise in the  
24 fitness measurement and biased fit results due to outlier fitness data points. Estimated false-positive  
25 rates ranged between 0.001 and 0.005. The relative abundance values shown in Fig. 2a-b were corrected  
26 for false positives using the estimated rates.

### 27 Comparison of synonymous mutations

28 The library contained a set of 39 sensors with the wild-type *lacI* CDS (but different DNA barcodes), and a  
29 set of 310 sensors with only synonymous nucleotide changes (*i.e.* no amino acid substitutions). Both sets  
30 had long-read sequencing coverage for the entire plasmid and were screened to retain only sensors with  
31 zero unintended mutations in the plasmid (*i.e.* no mutations in regions of the plasmid other than the *lacI*

1 CDS). The Hill equation fit results for those two sets were compared to determine whether synonymous  
2 SNPs affected the measurable phenotype of a sensor. The Kolmogorov-Smirnov test was used to  
3 compare the distributions of Hill equation parameters between these two sets. The resulting p-values,  
4 0.71, 0.40, 0.28, and 0.17 for  $G_0$ ,  $G_{\infty}$ ,  $EC_{50}$ , and  $n$  respectively, indicate that there were no significant  
5 differences between them. Additionally, the library contained 40 sets of sensors, each with four or more  
6 synonymous CDSs (including the set of synonymous wild-type sequences and 39 non-wild-type  
7 sequences). A hierarchical model was used to compare the Hill equation parameters within each set of  
8 synonymous CDSs. Within each set, the uncertainty associated with individual sensors was typically  
9 larger than the sensor-to-sensor variability estimated by the hierarchical model. Overall, these results  
10 indicate that synonymous SNPs did not measurably impact the phenotype of the sensor, so only the  
11 amino acid sequences were considered for any subsequent quantitative genotype-to-phenotype  
12 analysis.

### 13 [Analysis of single-substitution data](#)

14 The single amino acid substitution results presented in Fig. 4 are a combination of direct experimental  
15 observations, DNN model results, and estimates of  $G_0$  for missing substitutions.

16 For direct experimental observations, multiple sensor variants were often present in the library with the  
17 same single substitution. For each SNP-accessible substitution, if there was only one sensor variant in  
18 the library, the median and standard deviation for each parameter were used directly from the Bayesian  
19 inference using the Hill equation model. If there was more than one sensor variant with a given single  
20 substitution, the consensus Hill equation parameter values and standard deviations for that substitution  
21 were calculated using a hierarchical model based on the eight schools model<sup>34,35</sup>. The hierarchical model  
22 was applied separately for each Hill equation parameter. The logarithm of the parameter values was  
23 used as input to the hierarchical model, and the input data were centered and normalized by  $1.15 \times$  the  
24 minimum measurement uncertainty. The standard normal distribution was used as a loosely informative  
25 prior for the consensus mean effect, and a half-normal prior (mean = 0.5, std = 1) was used for the  
26 normalized consensus standard deviation (i.e. hierarchical standard deviation). These priors and  
27 normalization were chosen so that the model gave intuitively reasonable results for the consensus of  
28 two sensor variants (i.e. close to the results for the sensor variant with the lowest measurement  
29 uncertainty). Results for the hierarchical model were determined using Bayesian parameter estimation  
30 by Markov Chain Monte Carlo (MCMC) sampling with PyStan<sup>32</sup>. MCMC sampling was run with



1 4 independent chains, 10 000 iterations per chain (5000 warmup iterations), and the `adapt_delta`  
2 parameter set to 0.975.

3 For  $G_0$ , the direct experimental results were used for the 1047 substitutions plotted as gray points or red  
4 points and error bars in Fig. 4d. In addition, estimated values were used for the 83 missing substitutions  
5 that have been previously shown to result in an “always on” LacI phenotype (i.e., the  $I^-$  phenotype<sup>18,19</sup>).  
6 For these substitutions, plotted as pink-gray points and error bars in Fig. 4d, the median value was  
7 estimated to be equal to the wild-type value for  $G_\infty$  (24 000 MEF), and the geometric standard deviation  
8 was estimated to be 4-fold, both based on information from previous publications<sup>18,19</sup>. Note that these  
9 83 substitutions are completely missing from the experimental dataset, i.e. they are not found in any  
10 sensor variant, as single substitutions or in combination with other substitutions.

11 For  $G_\infty$  and  $EC_{50}$ , the direct experimental results were used for the 964 substitutions that are found as  
12 single substitutions in the library and that have a consensus standard deviation for  $\log_{10}(EC_{50})$  less than  
13 0.35. An additional 74 substitutions are found as single substitutions in the library, but with higher  $EC_{50}$   
14 uncertainty. For these substitutions, either  $EC_{50}$  is comparable to or higher than the maximum ligand  
15 concentration used for the measurement (2048  $\mu\text{mol/L}$  IPTG), or  $G_\infty$  is comparable to  $G_0$  (or both).  
16 Consequently, the dose-response curve is flat or nearly flat across the range of concentrations used, and  
17 the Bayesian inference used to estimate the Hill equation parameters results in  $EC_{50}$  and  $G_\infty$  estimates  
18 with large uncertainties. The DNN model can provide a better parameter estimate for these flat-  
19 response sensors because it uses data and relationships from the full library (e.g. the log-additivity  
20 of  $EC_{50}$ ) to predict parameter values for each single substitution. So, the DNN model results were used  
21 for these 74 substitutions. Finally, the DNN model results were used for an additional 953 substitutions  
22 that are found in the library, but only in combination with other substitutions (i.e. not as single  
23 substitutions).

## 24 Identification of high-frequency substitutions and structural domains associated with 25 inverted and band-stop sensors

26 The strongly inverted sensors discussed above and used for the plots in Extended Data Fig. 6a,c,e were  
27 identified by the following criteria:  $G_0/G_\infty \geq 2$ ,  $G_0 > G_{\infty,wt}/2$ ,  $G_\infty < G_{\infty,wt}/2$ , and  $EC_{50}$  between 3  $\mu\text{mol/L}$  and  
28 1000  $\mu\text{mol/L}$ . The strong band-stop sensors discussed above and used for the plots in  
29 Extended Data Fig. 6b,d,f were identified by the following criteria:  $G_0 > G_{\infty,wt}/2$ ,  $G_{min} < G_{\infty,wt}/2$ , and the  
30 slope,  $\partial \log(G)/\partial \log(L)$ , of less than -0.07 at low IPTG concentrations and greater than zero at higher IPTG



1 concentrations, both with 0.95 or higher posterior probability (from the GP model inference). In  
2 addition, the sets of strongly inverted and strong band-stop sensors were manually screened for likely  
3 false positives due to outlier fitness data points.

4 A hypergeometric test was used to determine the substitutions that occur more frequently in the set of  
5 strongly inverted or strong band-stop sensors than in the full library. For each possible amino acid  
6 substitution, the cumulative hypergeometric distribution was used to calculate the probability of the  
7 observed number of substitutions in inverted or band-stop sensors under a null model of no association.  
8 This probability was used as a p-value for the null hypothesis that the number of inverted or band-stop  
9 sensors with that substitution resulted from an unbiased random selection of sensors. Substitutions  
10 were considered to occur at significantly higher frequency if they had a p-value less than 0.005 and if  
11 they occurred more than once in the set of inverted or band-stop sensors. In the set of strongly inverted  
12 sensors, ten associated (higher frequency) substitutions were identified: S70I, K84N, D88Y, V96E, A135T,  
13 V192A, G200S, Q248H, Y273H, and A343G. In the set of strong band-stop sensors, eight associated  
14 substitutions were identified: V4A, A92V, H179Q, R195H, G178D, G265D, D292G, and R351G. To  
15 estimate the number of false-positives, random sets of sensors were chosen with the same sample size  
16 as the strongly inverted (43) or the strong band-stop (31) sensors and the same significance criteria was  
17 applied. From 300 independent iterations of the random selection, the estimated mean number of false-  
18 positive substitutions was 2.1 and 2.3 for the inverted and band-stop sensors, respectively.

19 A similar procedure was used to determine which structural domains within the protein are mutated  
20 with higher frequency in the inverted or band-stop sensors. The structural domains considered included  
21 the secondary structure domains from the complete crystal structure of LacI<sup>36</sup>, as well as larger  
22 structural domains (N-terminal core, C-terminal core, DNA-binding, dimer interface) and functional  
23 domains (ligand-binding, core-pivot). The p-value threshold used for significance was 0.025. For the  
24 strongly inverted sensors, six domains were identified with a higher frequency of substitutions: the  
25 dimer interface, residues within 7 Å of the ligand-binding pocket, helix 5, helix 11, strand I, and the N-  
26 terminal core. For the strong band-stop sensors, three domains were identified: the C-terminal core,  
27 strand J, and helix 9. From 300 independent random selections of sensors, the estimated mean number  
28 of false-positive domains was 0.39 and 0.50 for the inverted and band-stop sensors, respectively.

### 29 [Deep neural network \(DNN\) modeling](#)

30 The dataset was pruned to a set of high-quality sequences for DNN modeling. Specifically, data for a LacI  
31 sensor variant was only used for modeling if it satisfied the following criteria:

- 1        1. No mutations were found in the long-read sequencing results for the regions of the plasmid
- 2        encoding kanamycin resistance, the origin of replication, the tetA and YFP genes, and the
- 3        regulatory region containing the promoters and ribosomal binding sites for *lacI* and tetA
- 4        (Extended Data Fig. 8).
- 5        2. The total number of barcode read counts for a sensor variant was greater than 3000.
- 6        3. The number of amino acid substitutions was less than 14.
- 7        4. The measurement uncertainty for  $\log_{10}(G_{\infty})$  was less than 0.7.
- 8        5. The results of the Hill equation model and the GP model agreed at all 12 IPTG concentrations
- 9        (see above).

10    After applying the quality criteria listed above, 47 462 sensor variants remained for DNN modeling.

11    Amino acid sequences were represented as one-hot encoded vectors of length  $L=2536$ , and with  
12    mutational paths represented as  $K \times L$  tensors for a sequence with  $K$  substitutions. The logarithm of the  
13    Hill equation parameter values were normalized to a standard deviation of 1, and then shifted by the  
14    corresponding value of the wild-type sequence in order to correctly represent the prediction goal of the  
15    change in each parameter relative to the wild-type. A long-term, short-term recurrent neural network  
16    was selected for the underlying model<sup>37</sup>, with 16 hidden units, a single hidden layer, and hyperbolic  
17    tangent (tanh) non-linearities. Inference was performed in pytorch<sup>38</sup> using the Adam optimizer<sup>39</sup>. For  
18     $EC_{50}$  and  $G_0$ , the contribution of individual data points to the regression loss were weighted inversely  
19    proportional to their experimental uncertainty. Model selection was performed with 10-fold cross-  
20    validation on the training set (80 % of all available data). Approximate Bayesian inference was  
21    performed with the Bayes-by-backprop approach<sup>17</sup>. Briefly, this substitutes the point-estimate  
22    parameters of the neural network with variational approximations to a Bayesian model, represented as  
23    a mean and variance of a normal random variable. Effectively, this only doubles the number of  
24    parameters in the model. A mixture of two normal distributions was used as a prior for each parameter  
25    weight, with the two mixture components having high and low variance respectively. This prior emulates  
26    a sparsifying spike-slab prior while remaining tractable for inference based on back-propagation.  
27    Posterior means of each weight were used to calculate posterior predictive means, while Monte-Carlo  
28    draws from the variational posterior were used to assess posterior predictive intervals.

## 1 Data availability

2 The raw sequence data have been deposited in the NCBI Sequence Read Archive and are available under  
3 the project accession number PRJNA643436.

4 The processed data table containing information for each Lacl variant in the library is publicly available  
5 via the NIST Science Data Portal, with the identifier ark:/88434/mds2-2259  
6 (<https://data.nist.gov/od/id/mds2-2259> or <https://doi.org/10.18434/M32259>).

## 7 Code availability

8 All custom data analysis code is available at [https://github.com/djross22/nist\\_lacl\\_landscape\\_analysis](https://github.com/djross22/nist_lacl_landscape_analysis).

## 9 Acknowledgements

10 We would like to thank Vanya Paralanov, Daniel V. Samarov, Aaron G. Kusne, and Swarnavo Sarkar for  
11 discussions during planning and execution of this work. We would also like to thank Jayan Rammohan,  
12 William B. O'Dell, Ben M. Scott, Zvi Kelman, and Elizabeth A. Strychalski for insights during the  
13 experimental work, as well as comments on the manuscript.

## 14 Author contributions

15 D.S.T., and D.R. conceived of the process.

16 D.S.T, S.L., and D.R. developed the experimental workflow.

17 D.S.T. designed, built, and tested genetic constructs.

18 E.F.R., N.A., and D.R. developed and programmed automation protocols.

19 D.S.T., E.F.R., N.A., O.V., and D.R. performed landscape and verification experiments.

20 P.D.T. and D.R. performed Bayesian inference and model fitting.

21 P.D.T. designed and evaluated the recurrent architecture for machine learning.

22 P.D.T., N.D.O, and D.R. contributed to long-read sequencing analysis.

23 D.S.T., P.D.T, A.P., and D.R. wrote the manuscript.

24 All authors contributed to the manuscript.

1

2 [Disclaimer](#)

3 The authors declare no competing interests

4 Certain commercial equipment, instruments, or materials are identified to adequately specify  
5 experimental procedures. Such identification neither implies recommendation nor endorsement by the  
6 National Institute of Standards and Technology nor that the equipment, instruments, or materials  
7 identified are necessarily the best for the purpose.

8 Correspondence and requests for materials should be addressed to David Ross, [david.ross@nist.gov](mailto:david.ross@nist.gov).
